# Supplementary material for: Viral time capsule: a global photo-elicitation study of child and adolescent mental health professionals during COVID-19
Source: Springer Nature journal article supplement (doi:10.1186/s13034-021-00359-5), 2021-02-02
Supplement: MOESM1 [file 18826194]

**Appendix 1. List of countries with at least one photo-elicitation contribution to the study.**

| <b>Continent</b><br>(number of countries) | <b>Country</b>      | <b>World Bank classification</b> |
|-------------------------------------------|---------------------|----------------------------------|
| <b>Africa</b> (6)                         | *Cameroon           | LMI                              |
|                                           | Egypt               | LMI                              |
|                                           | Nigeria             | LMI                              |
|                                           | Rwanda              | LI                               |
|                                           | *South Africa       | UMI                              |
|                                           | *Tunisia            | LMI                              |
| <b>The Americas</b> (10)                  | *Barbados           | HI                               |
|                                           | *Brazil             | UMI                              |
|                                           | *Canada             | HI                               |
|                                           | *Chile              | HI                               |
|                                           | Colombia            | UMI                              |
|                                           | *Dominican Republic | UMI                              |
|                                           | Ecuador             | UMI                              |
|                                           | Mexico              | UMI                              |
|                                           | *United States      | HI                               |
|                                           | Uruguay             | HI                               |
| <b>Asia</b> (17)                          | *Bangladesh         | LMI                              |
|                                           | China               | LMI                              |
|                                           | Hong Kong           | HI                               |
|                                           | *India              | LMI                              |
|                                           | Indonesia           | LMI                              |
|                                           | *Israel             | HI                               |
|                                           | *Japan              | HI                               |
|                                           | * Pakistan          | LMI                              |
|                                           | Philippines         | LMI                              |
|                                           | Qatar               | HI                               |
|                                           | Saudi Arabia        | HI                               |
|                                           | Singapore           | HI                               |
|                                           | South Korea         | HI                               |
|                                           | Taiwan              | HI                               |
|                                           | Turkey              | UMI                              |
|                                           | UAE                 | HI                               |
|                                           | Vietnam             | LMI                              |
| <b>Europe</b> (19)                        | Albania             | UMI                              |
|                                           | Andorra             | HI                               |
|                                           | Austria             | HI                               |
|                                           | Cyprus              | HI                               |
|                                           | France              | HI                               |
|                                           | Germany             | HI                               |

|                    |                |     |
|--------------------|----------------|-----|
|                    | Greece         | HI  |
|                    | *Ireland       | HI  |
|                    | Lithuania      | HI  |
|                    | Montenegro     | UMI |
|                    | Netherlands    | HI  |
|                    | *Poland        | HI  |
|                    | Russia         | UMI |
|                    | Slovakia       | HI  |
|                    | *Spain         | HI  |
|                    | Sweden         | HI  |
|                    | Switzerland    | HI  |
|                    | Ukraine        | LMI |
|                    | United Kingdom | HI  |
| <b>Oceania (2)</b> | Australia      | HI  |
|                    | New Zealand    | HI  |

\* Image from countries denoted with an asterisk are included in Appendix 2.

*Note:* Based on contributions from 188 entrants, spanning 54 countries.

*Note:* World Bank classification is based on 2020 data; LI = low income; LMI = low middle income; UMI = upper middle income; HI = high income.
