# Supplementary material for: Viral time capsule: a global photo-elicitation study of child and adolescent mental health professionals during COVID-19
Source: Springer Nature journal article supplement (doi:10.1186/s13034-021-00359-5), 2021-02-02
Supplement: MOESM2 [file 18826194]

1.Place

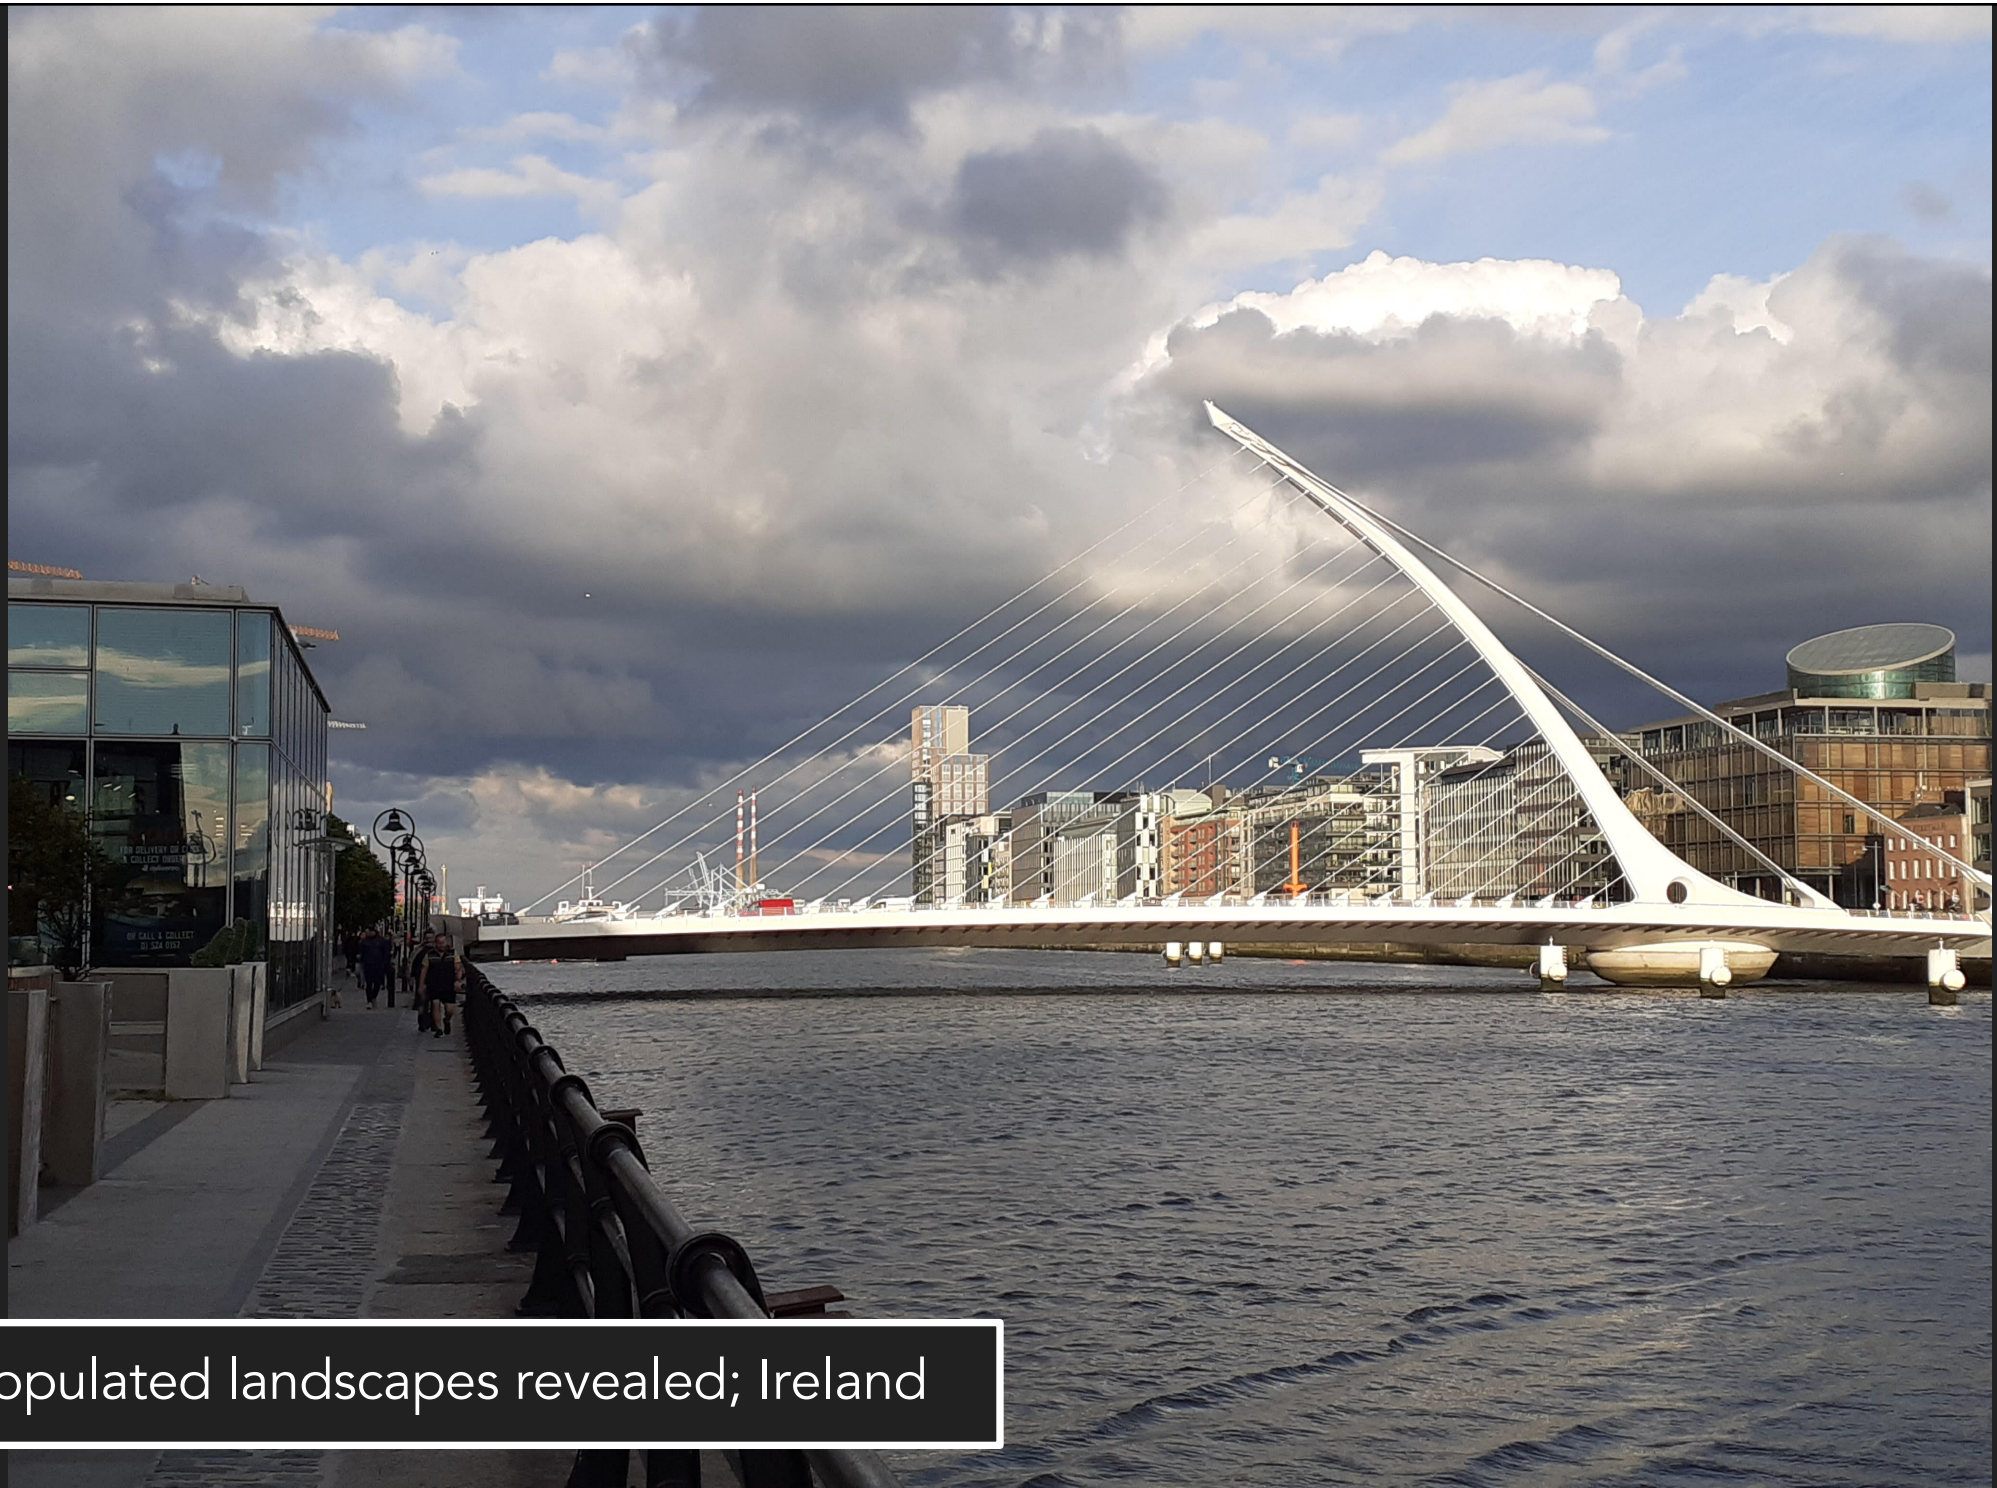

1.1 Unpopulated landscapes revealed; Ireland



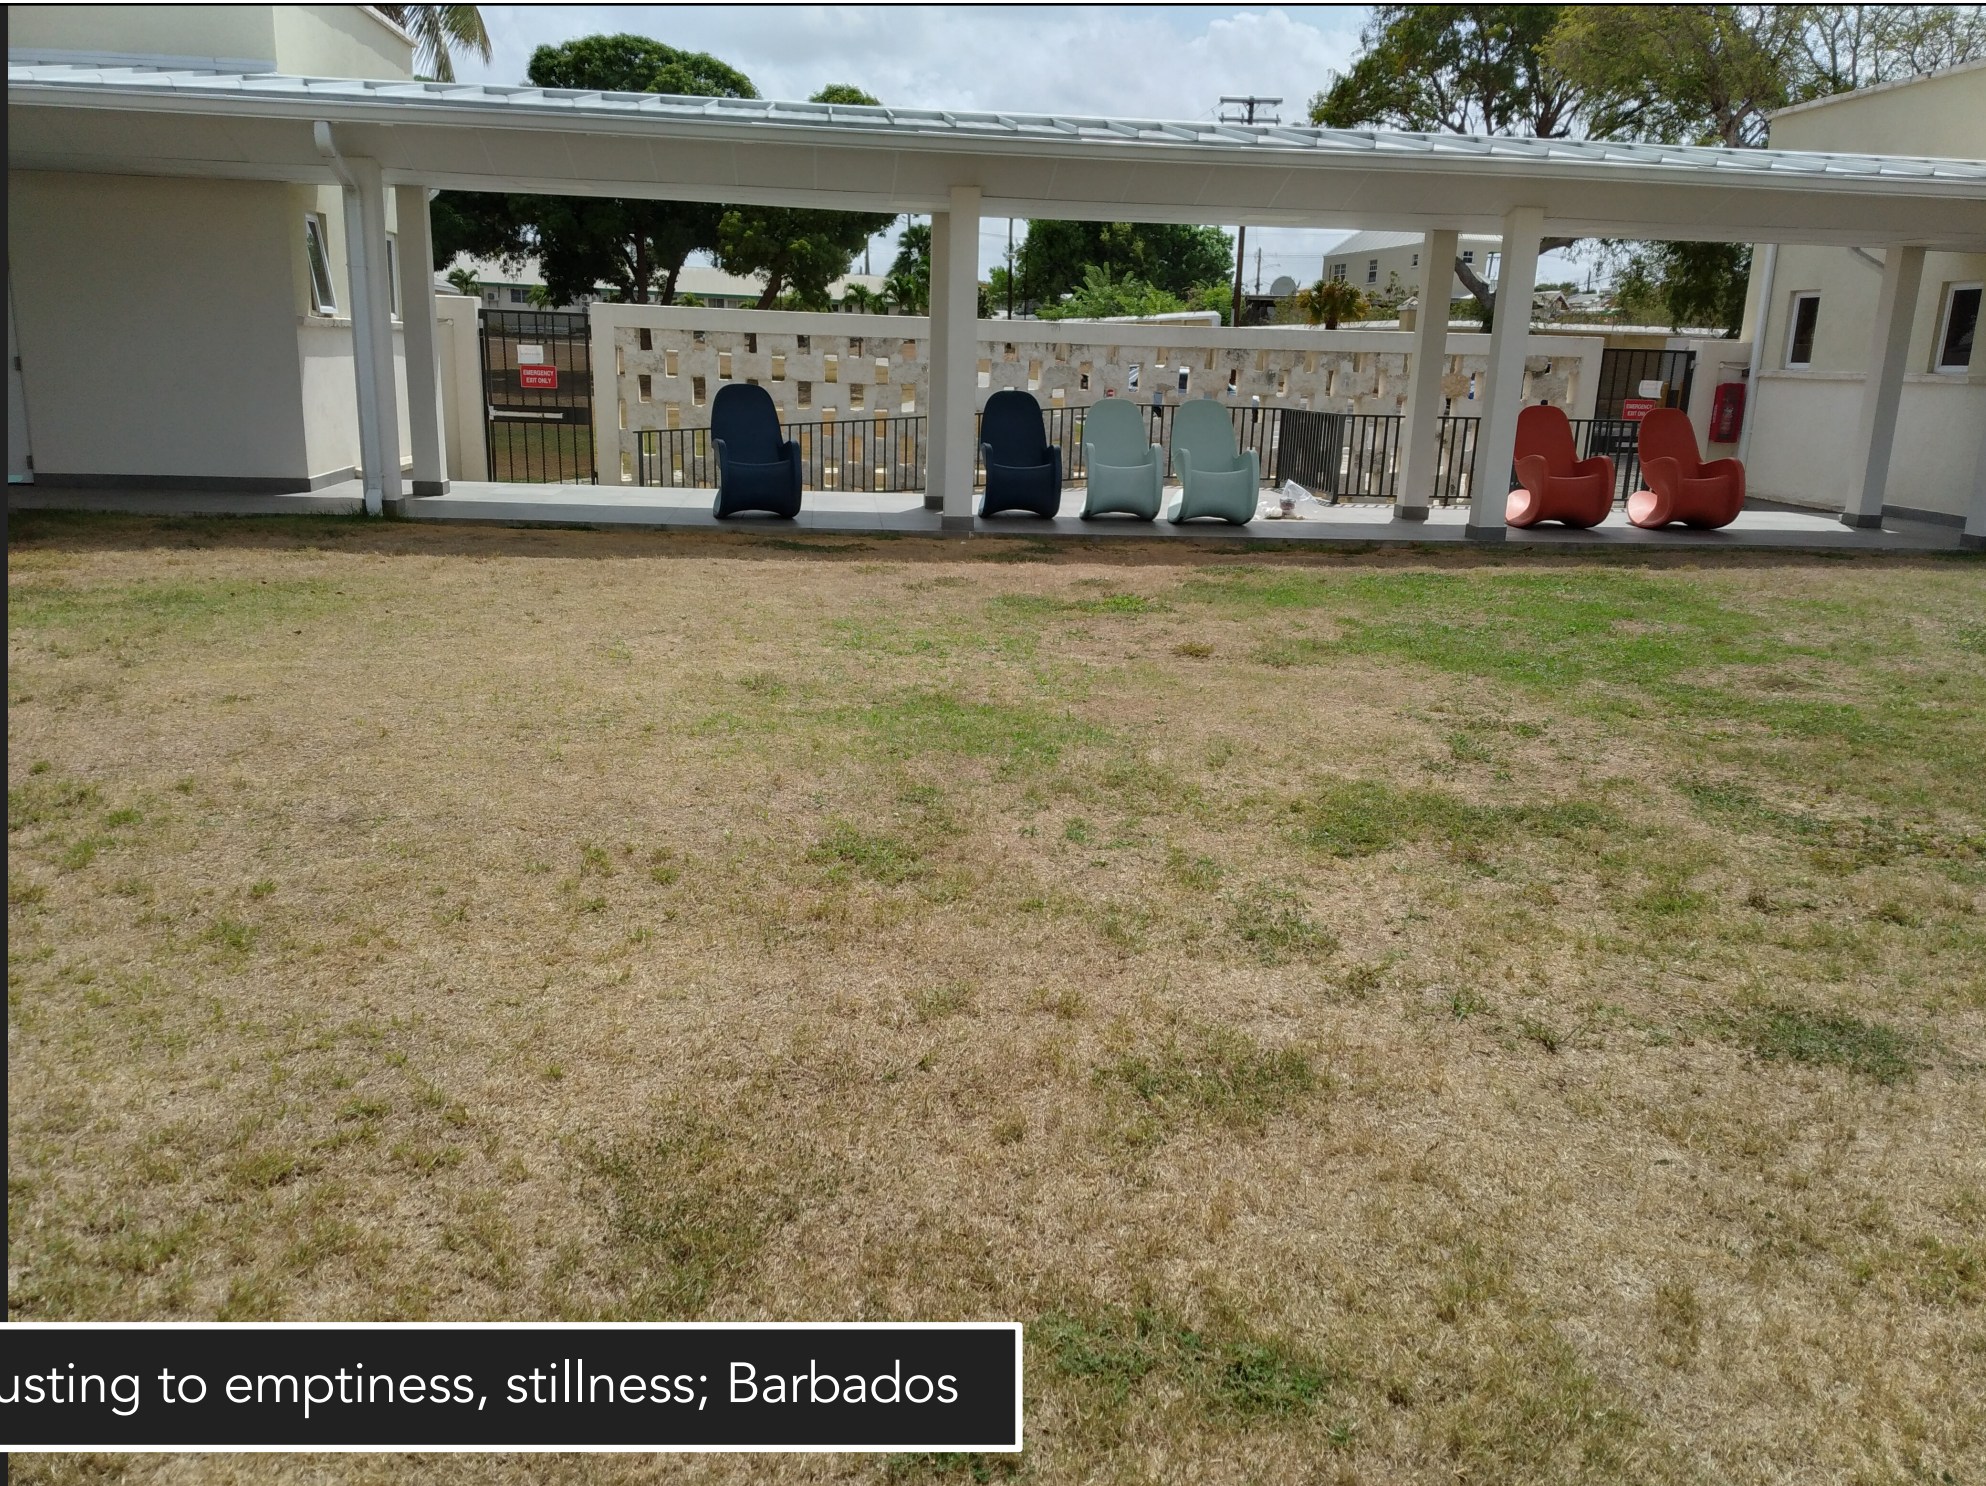

1.1 Adjusting to emptiness, stillness; Barbados



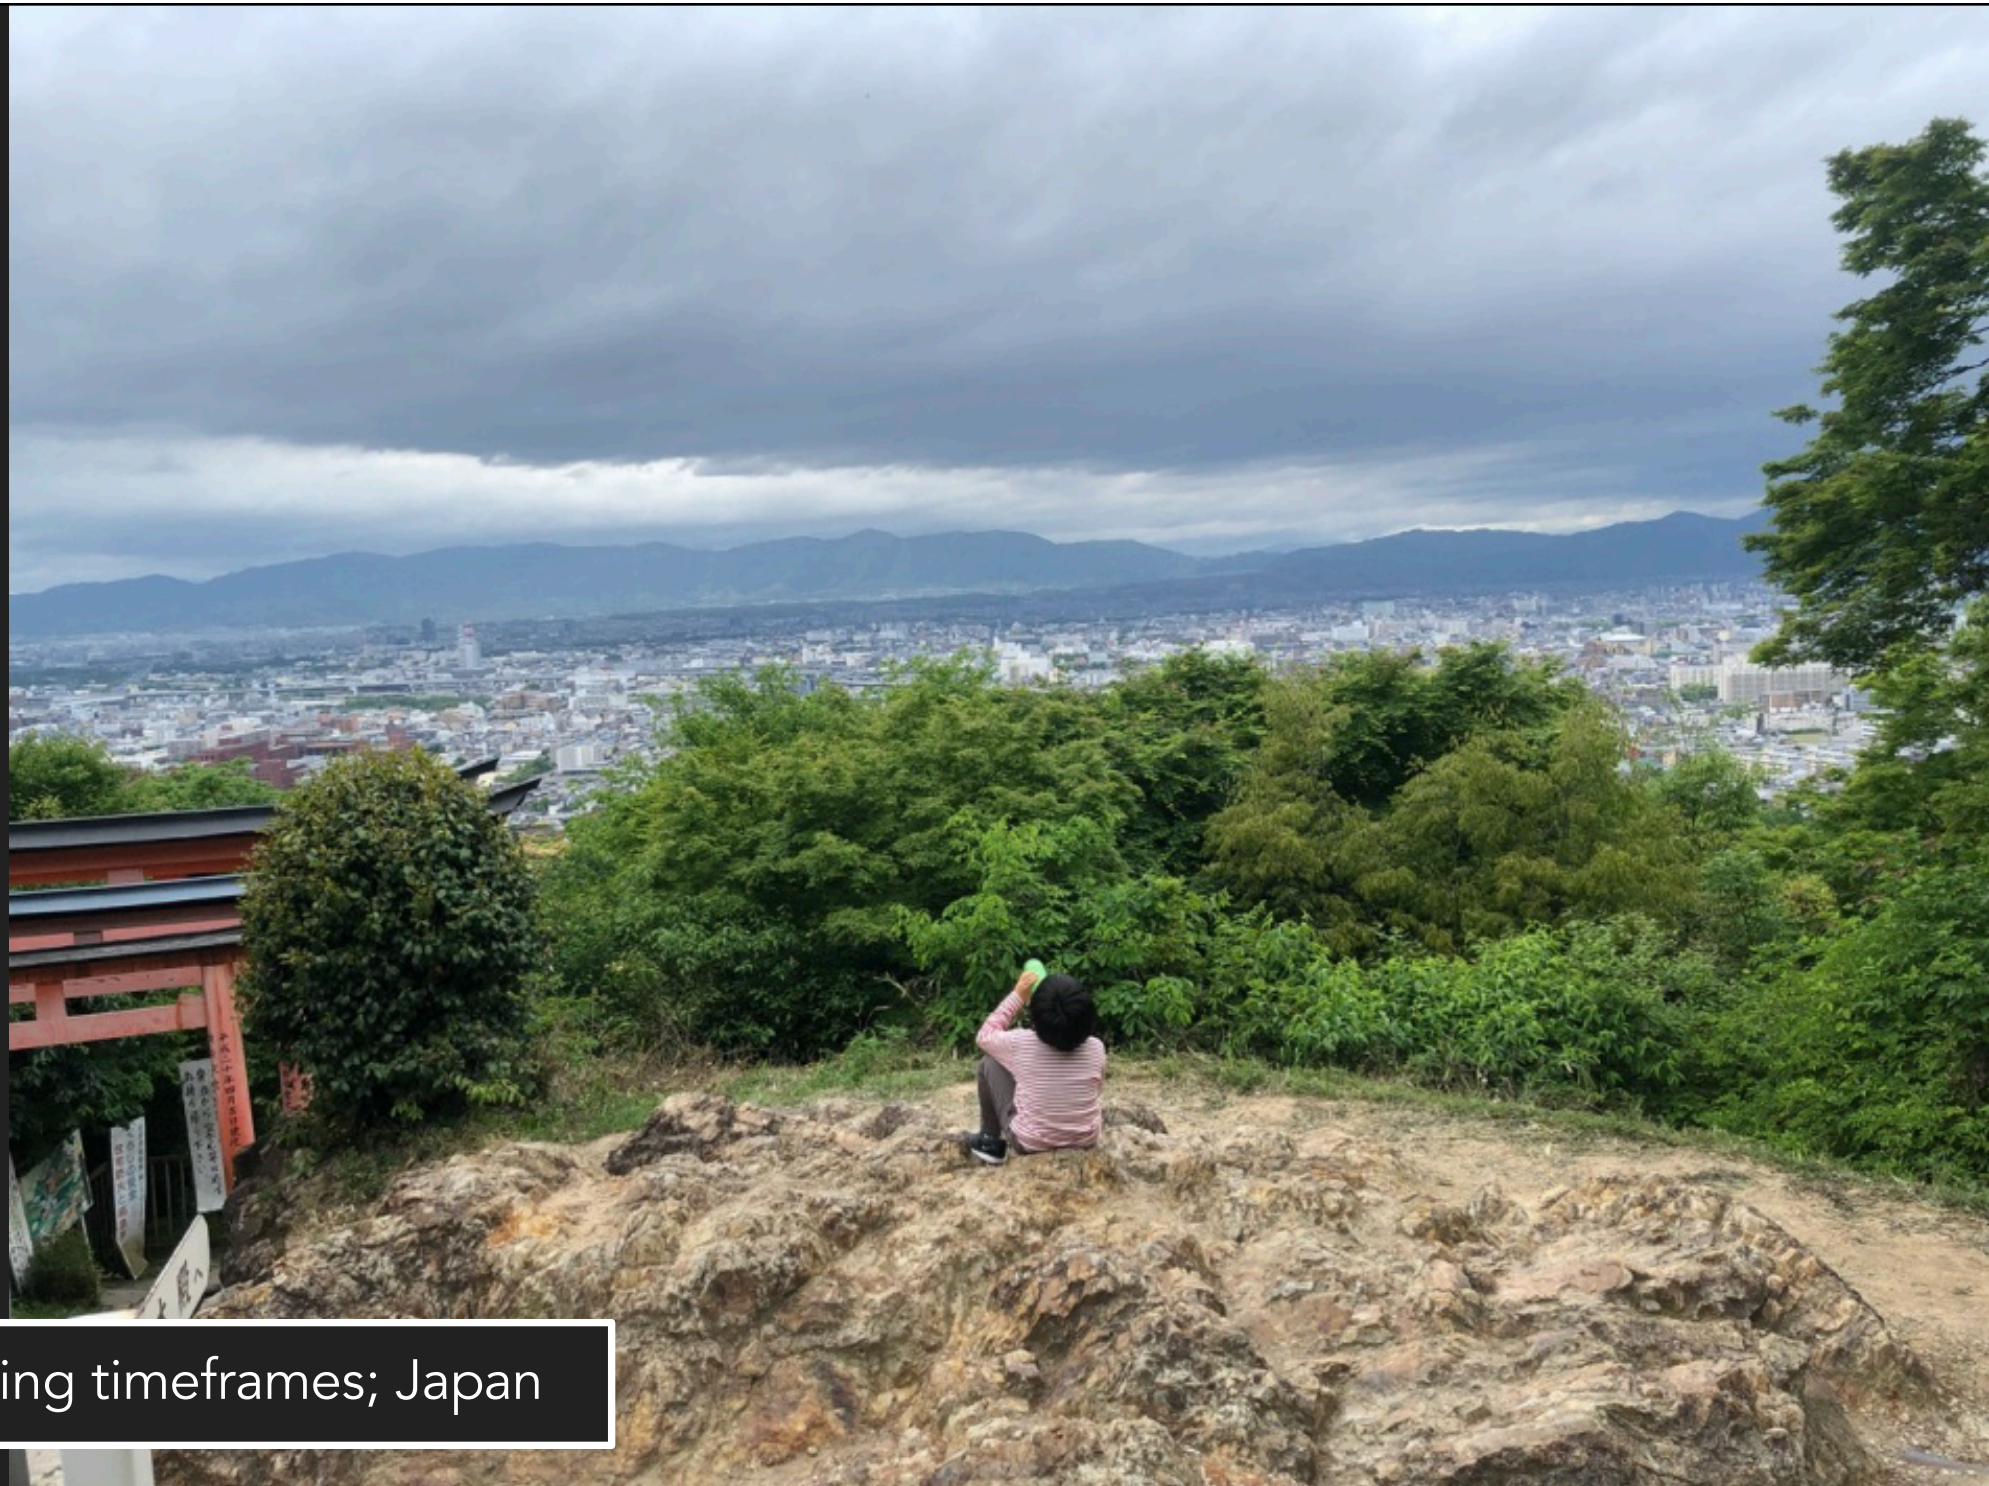

1.2 Shifting timeframes; Japan



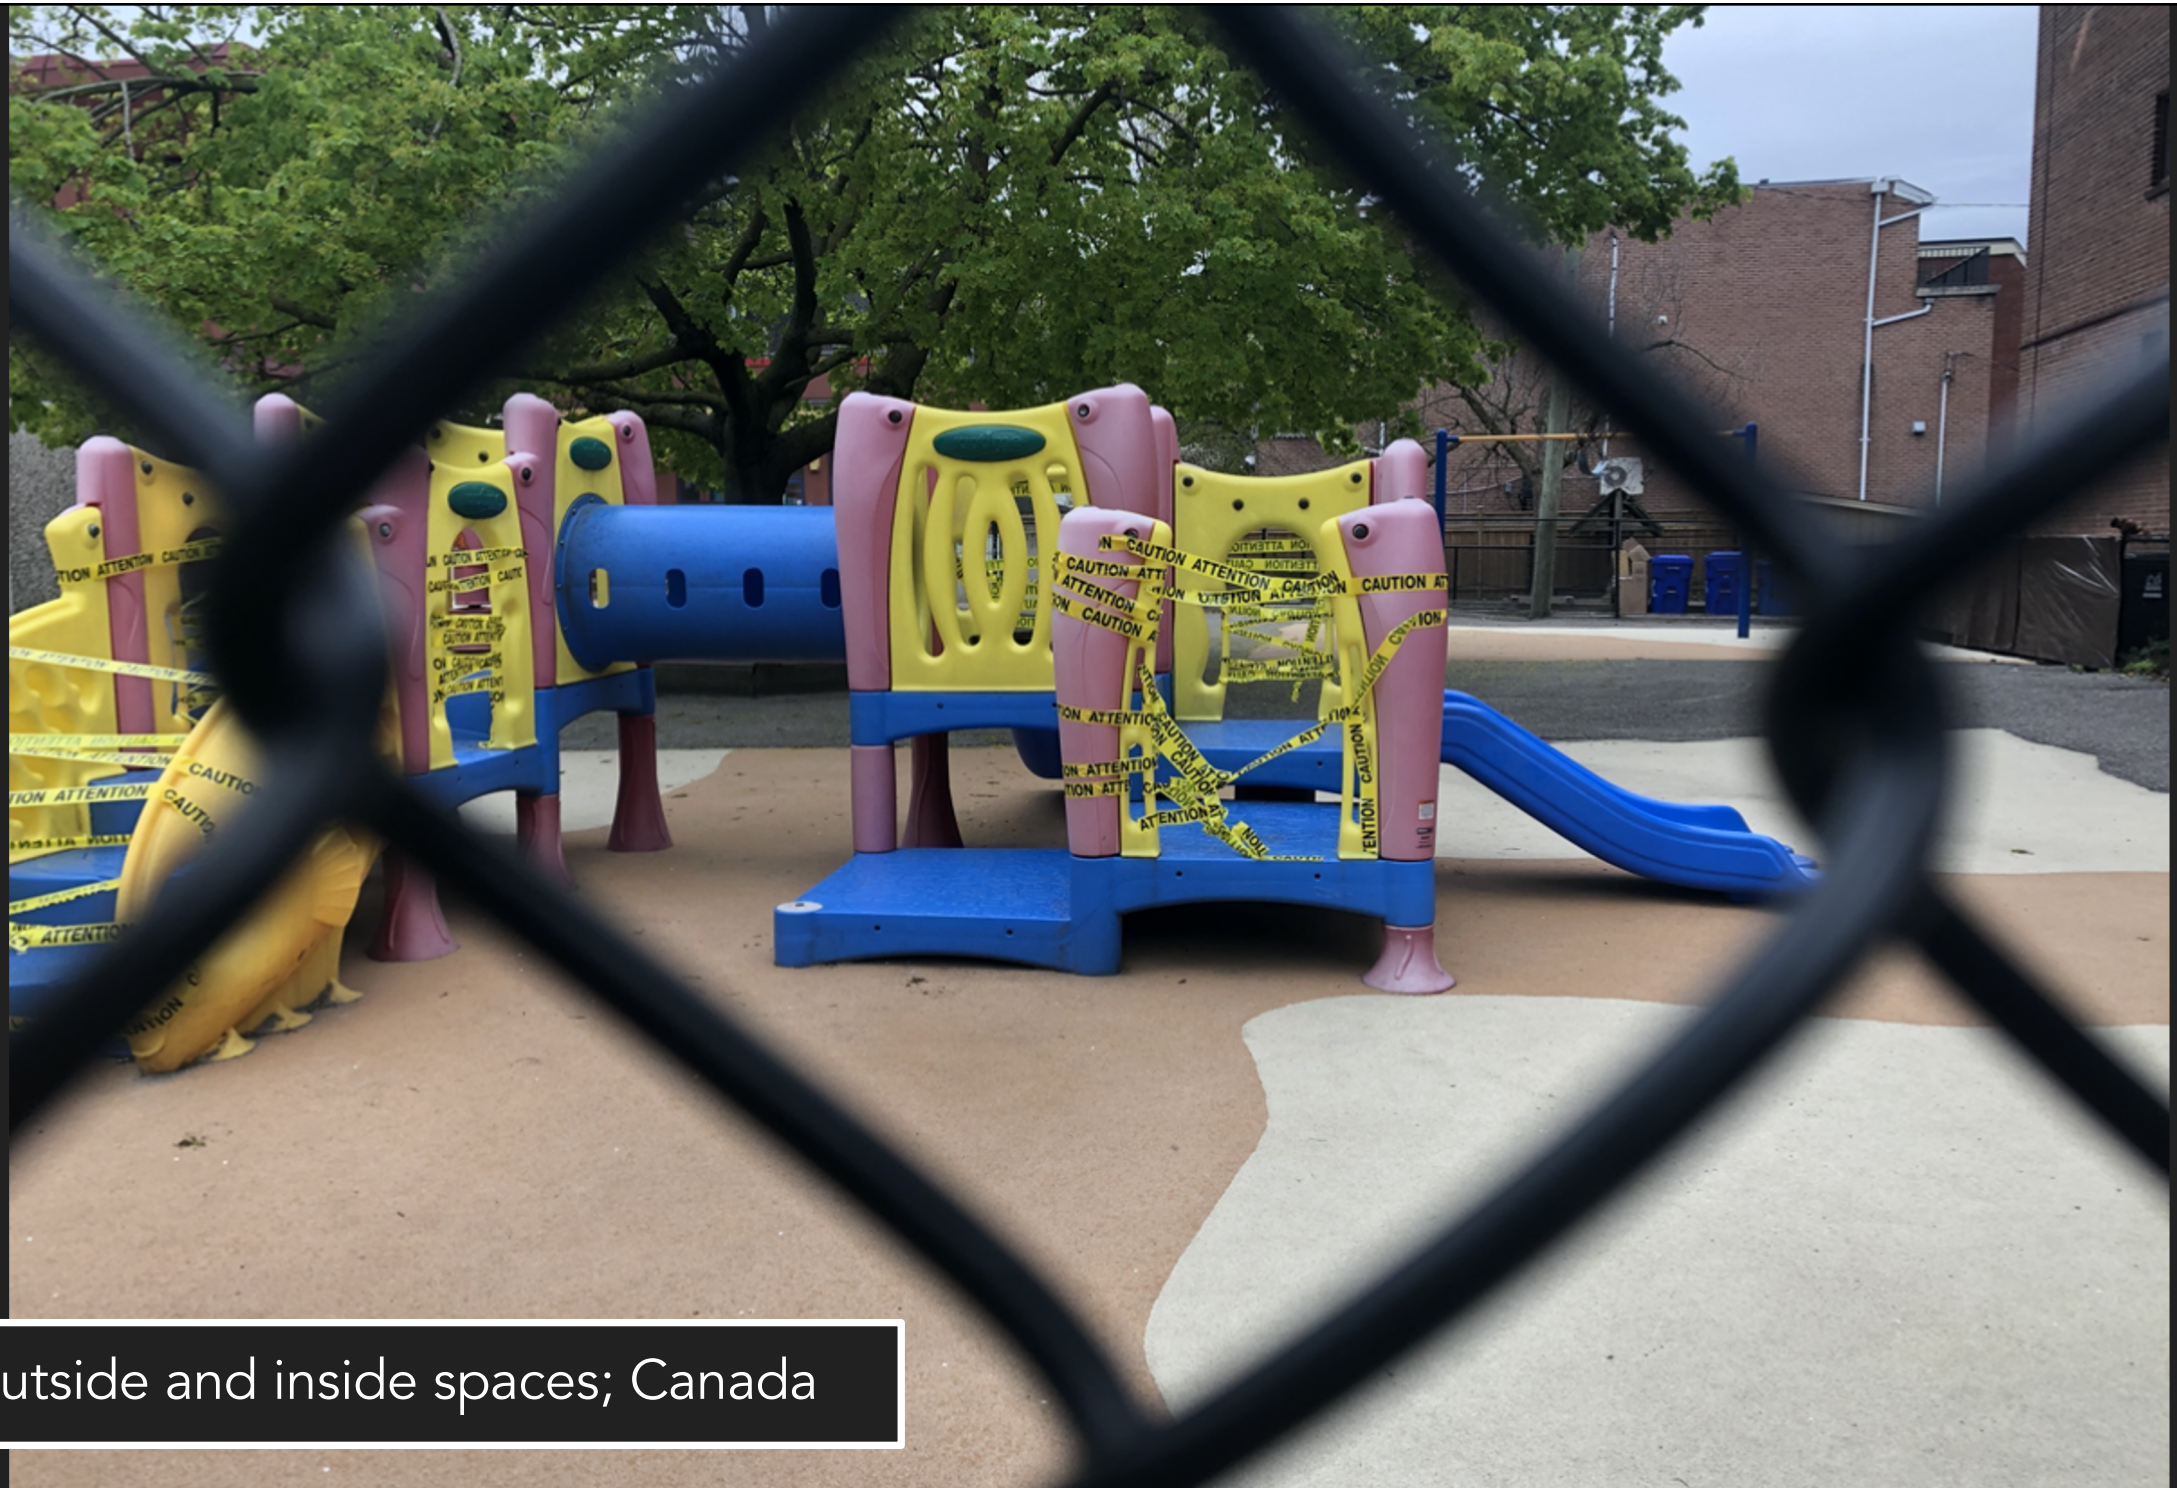

1.3 Outside and inside spaces; Canada



### 1.3 Blending of personal and professional spaces; Bangladesh

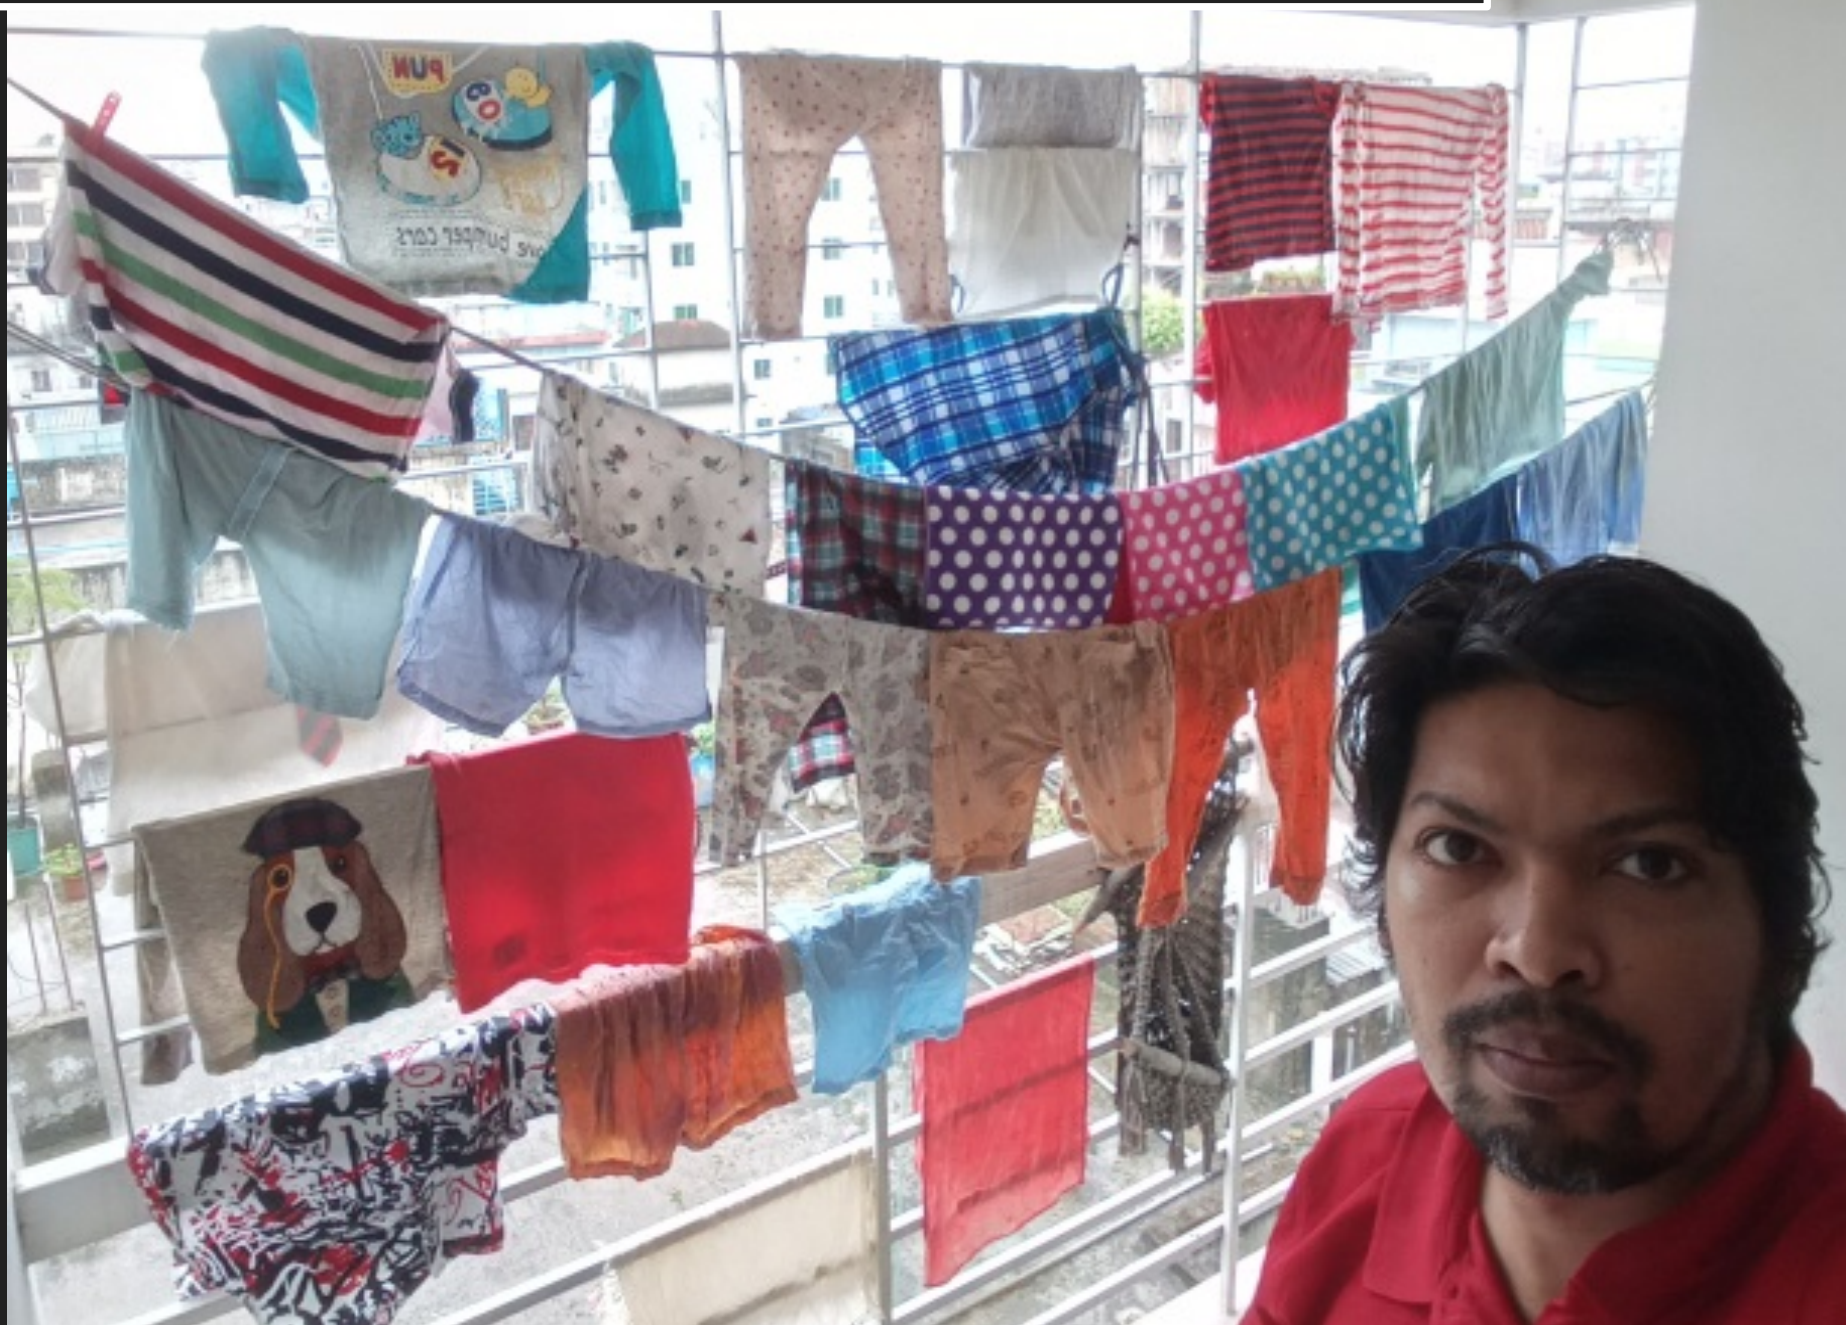



# 2. Person

## 2.1 Disruption to life rhythms; Spain

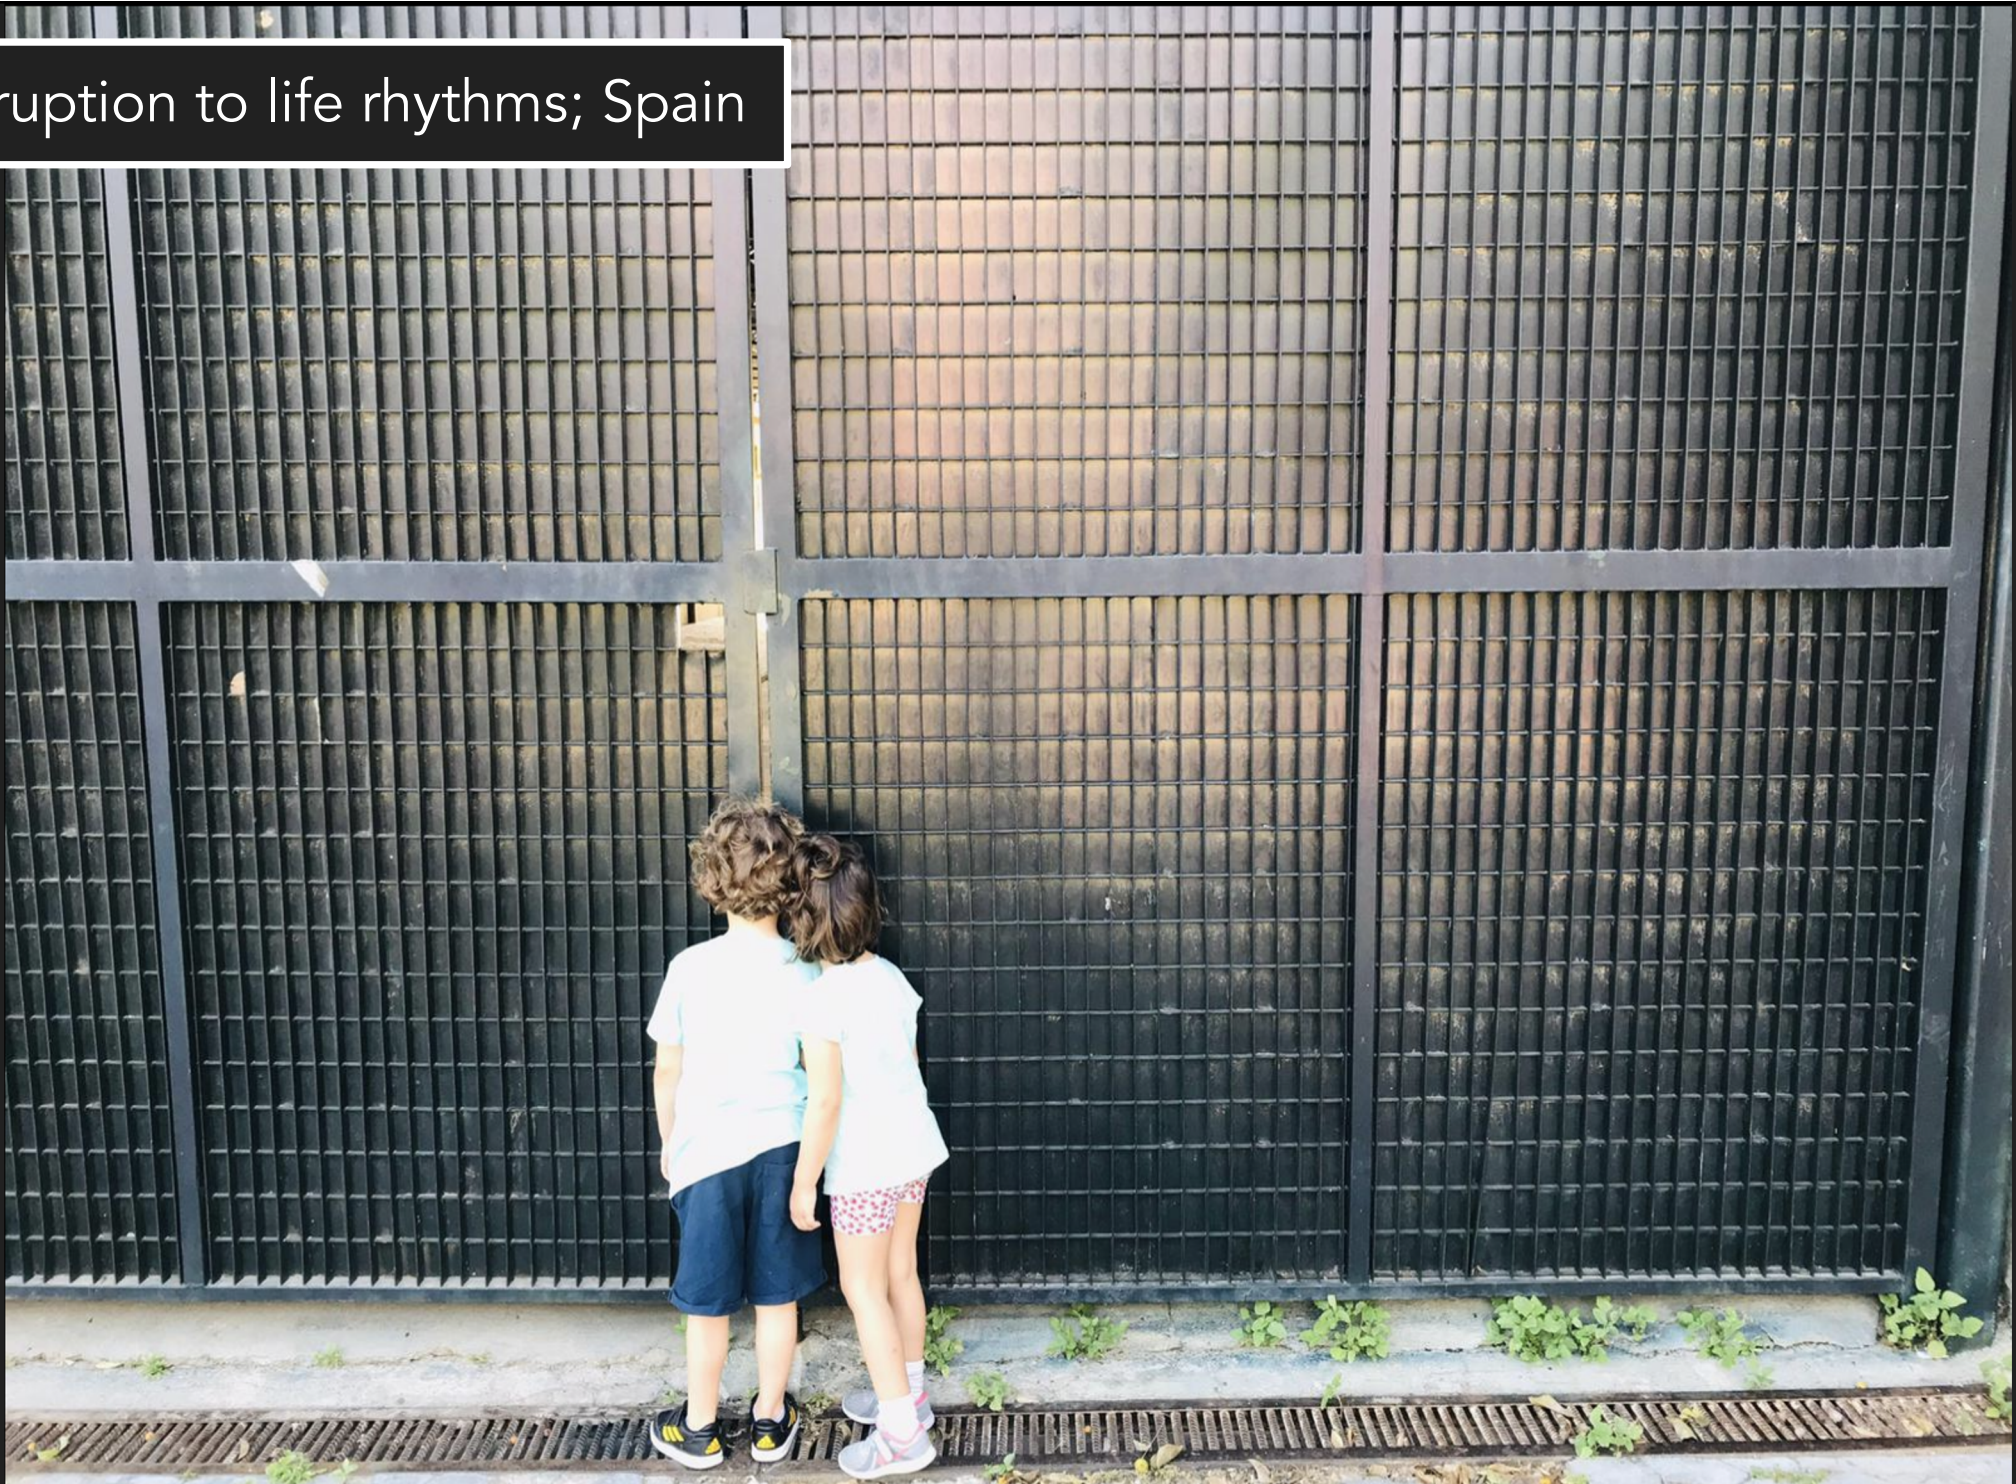



## 2.1 Family impact; Brazil

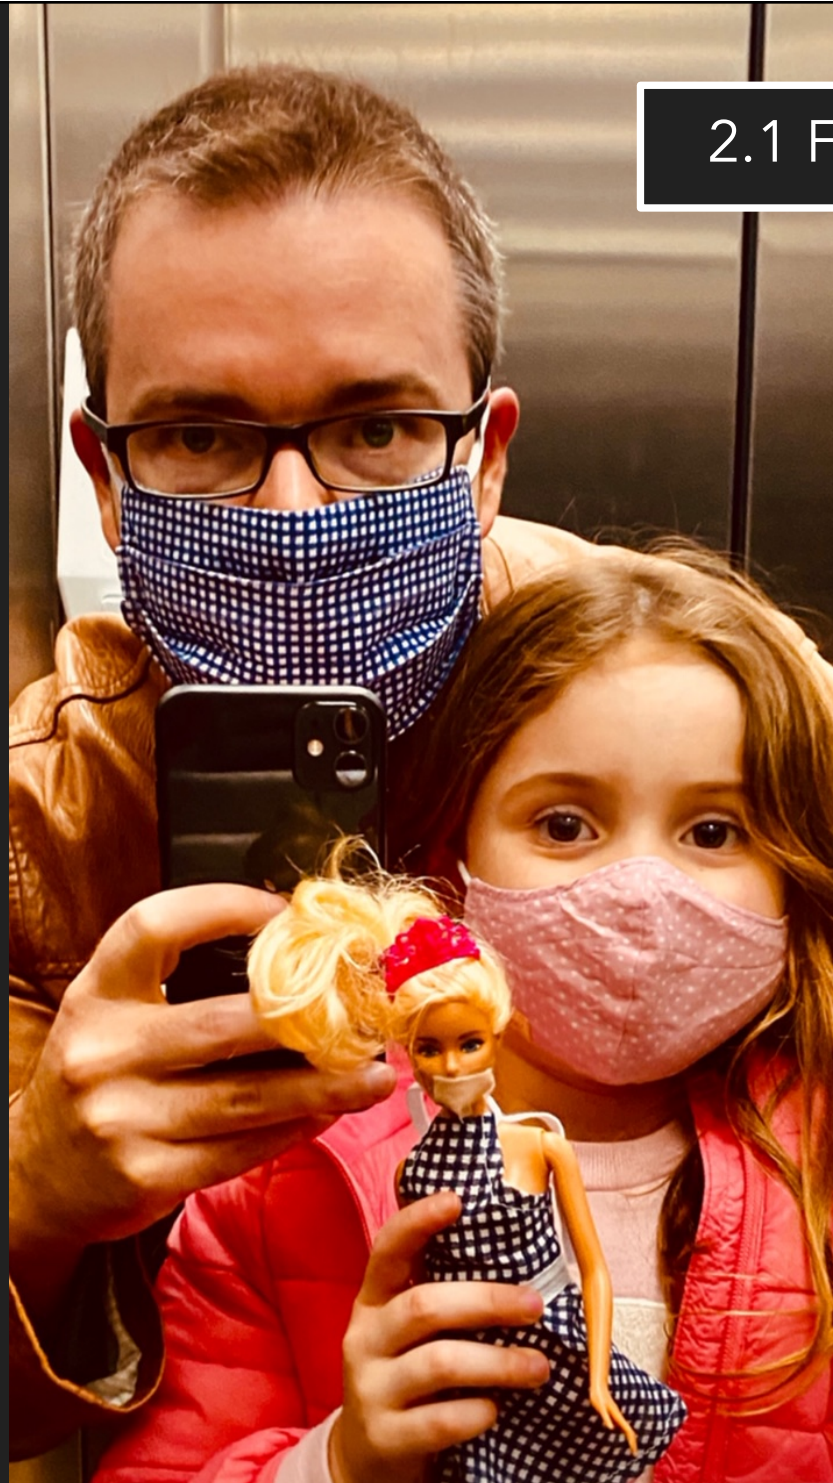

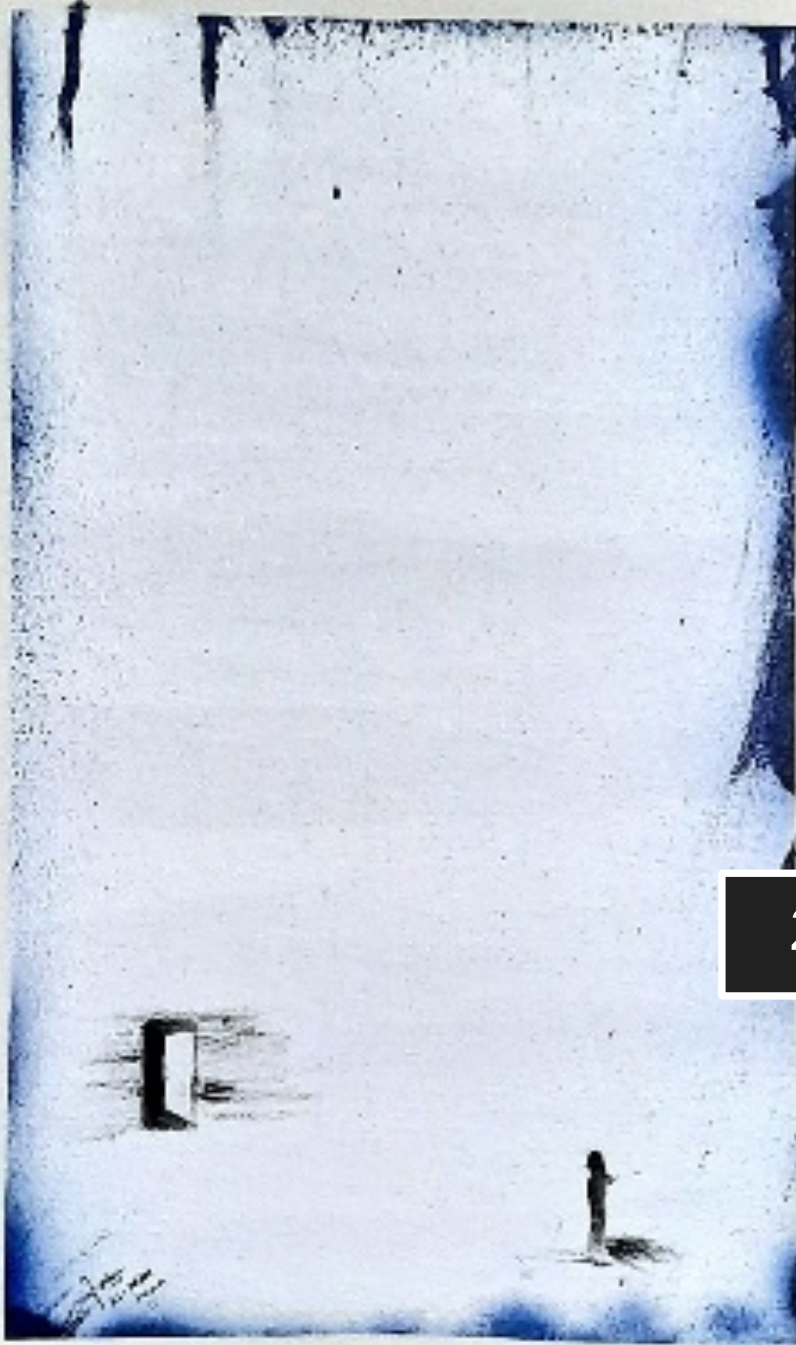

## 2.2 Emotional toll; Pakistan

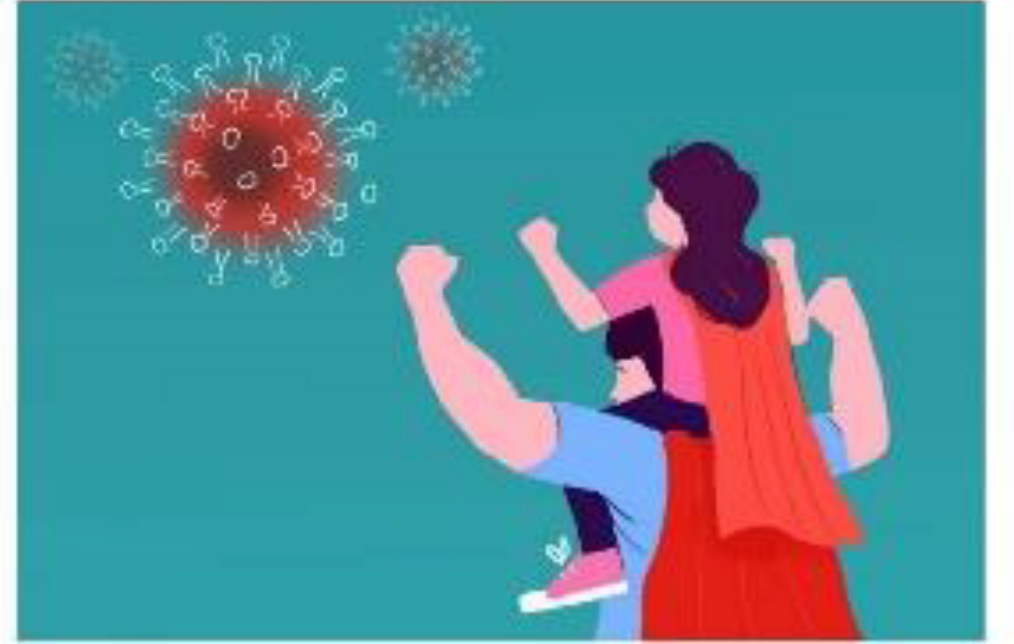

کوویڈ 19 (COVID-19) کے مطالعے کے مطابق  
کیوبا 135 ممالک تک پھیلنے کی اطلاعات ملتے کے بعد  
(اس میں مزید اضافے کا امکان ہے)، دنیا بھر میں لاکھوں  
بچوں کی زندگیاں متاثر ہوئی ہیں



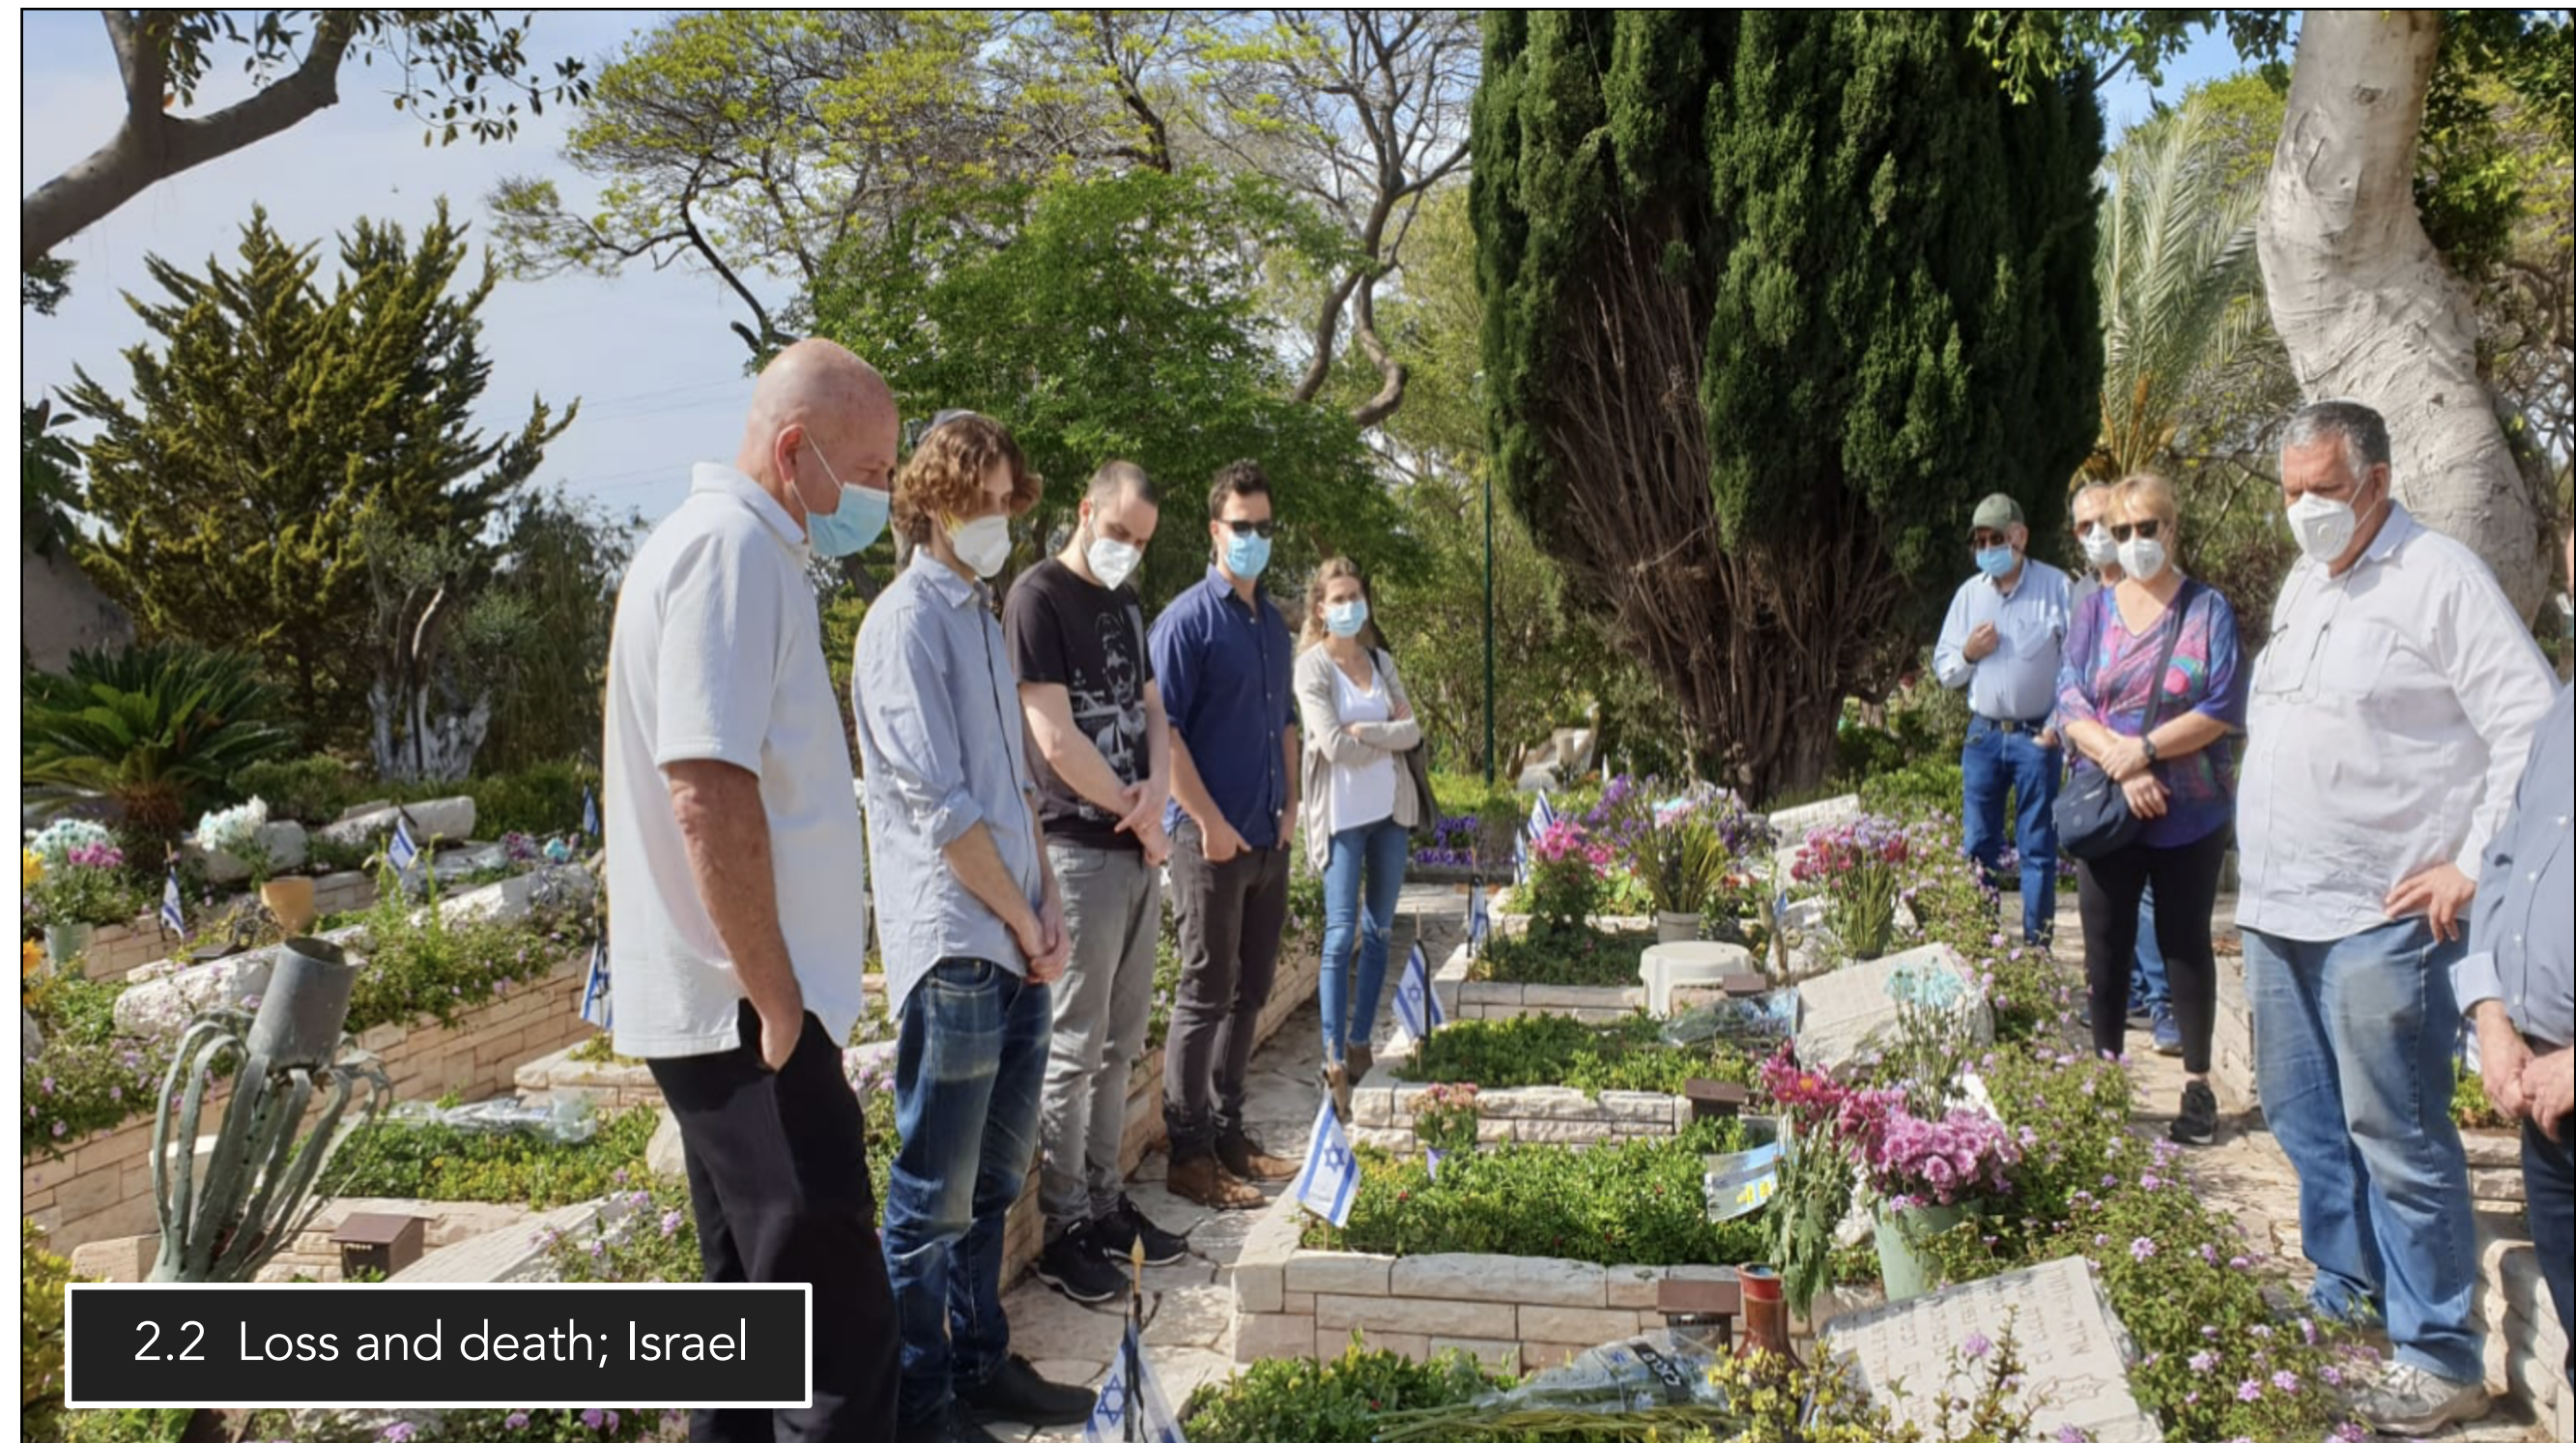

2.2 Loss and death; Israel



## 2.3 Positives of the pandemic; USA

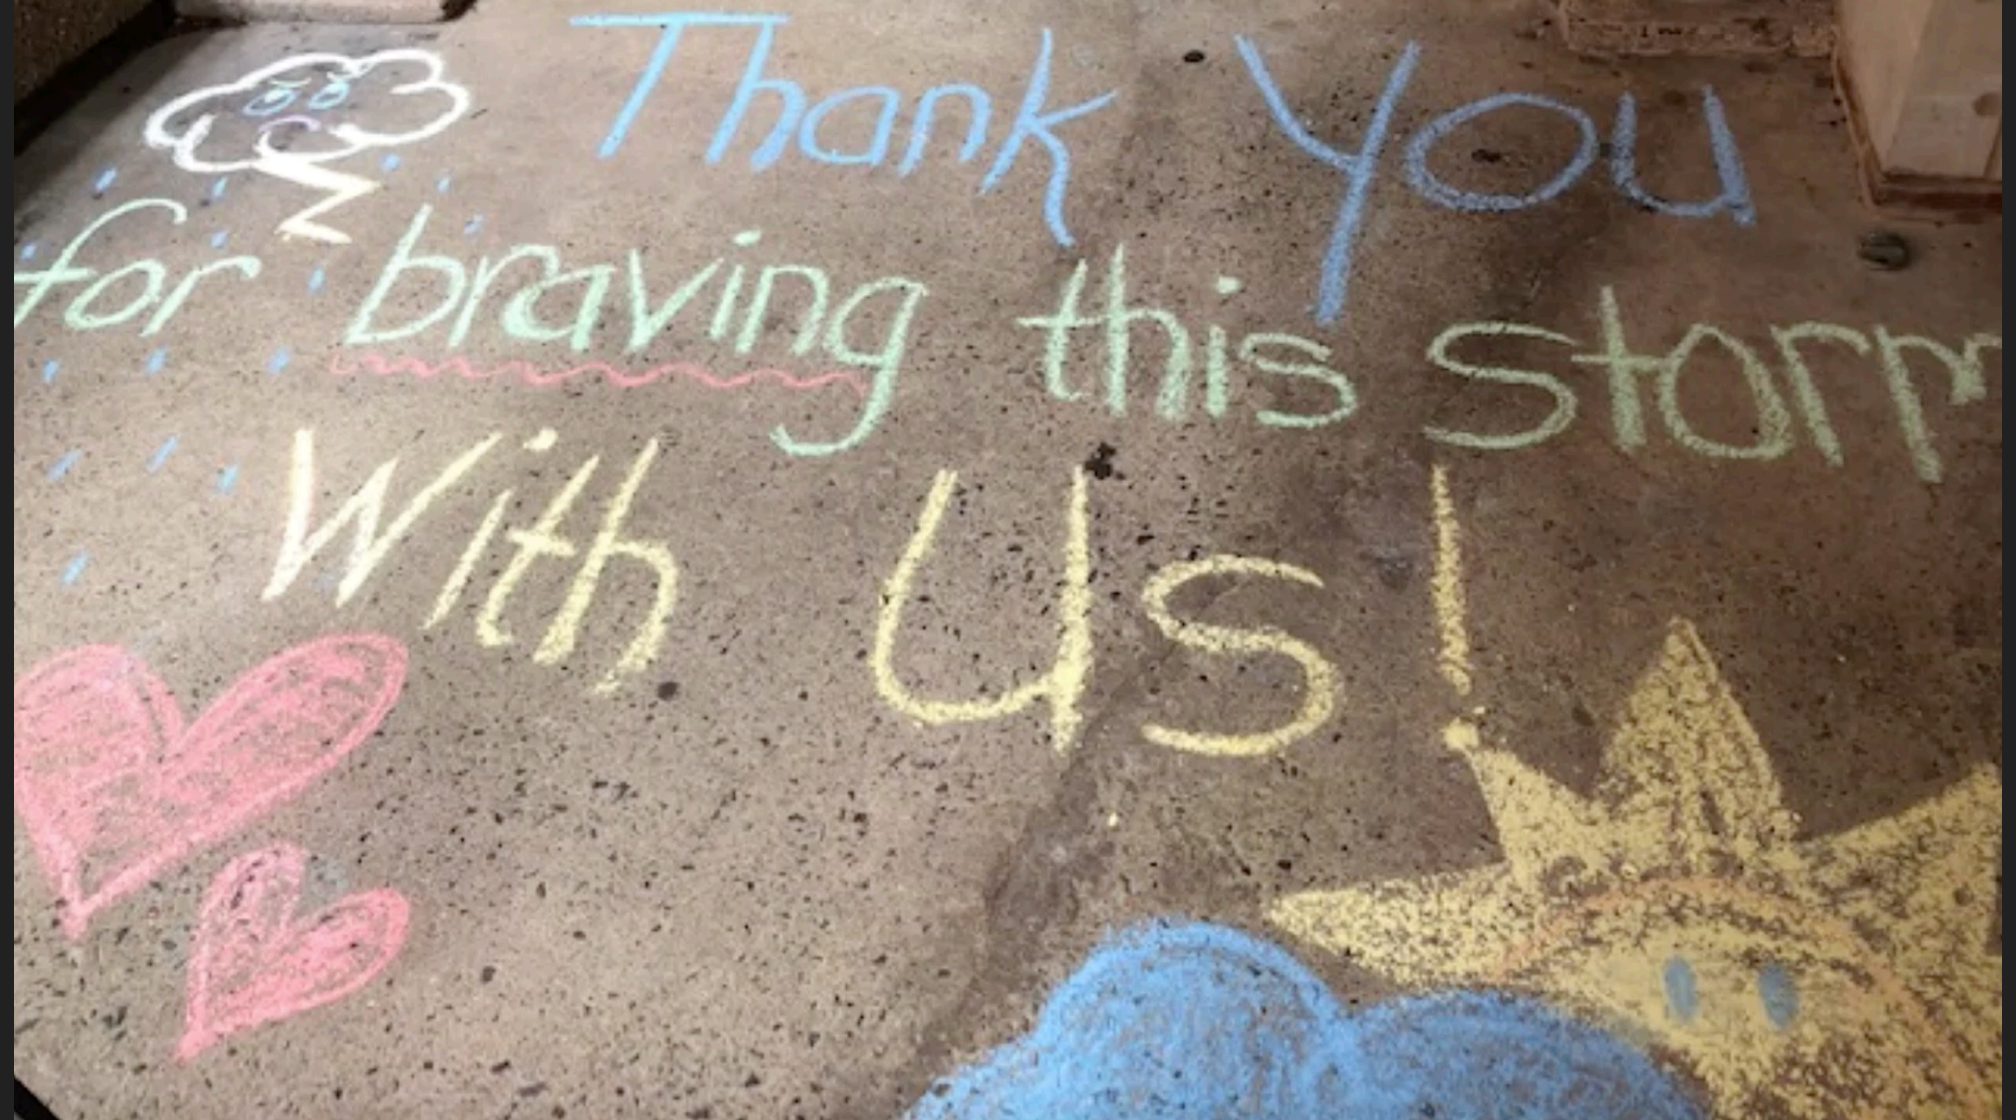



# 3. Profession

### 3.1 Virtual opportunities and limitations; Tunisia

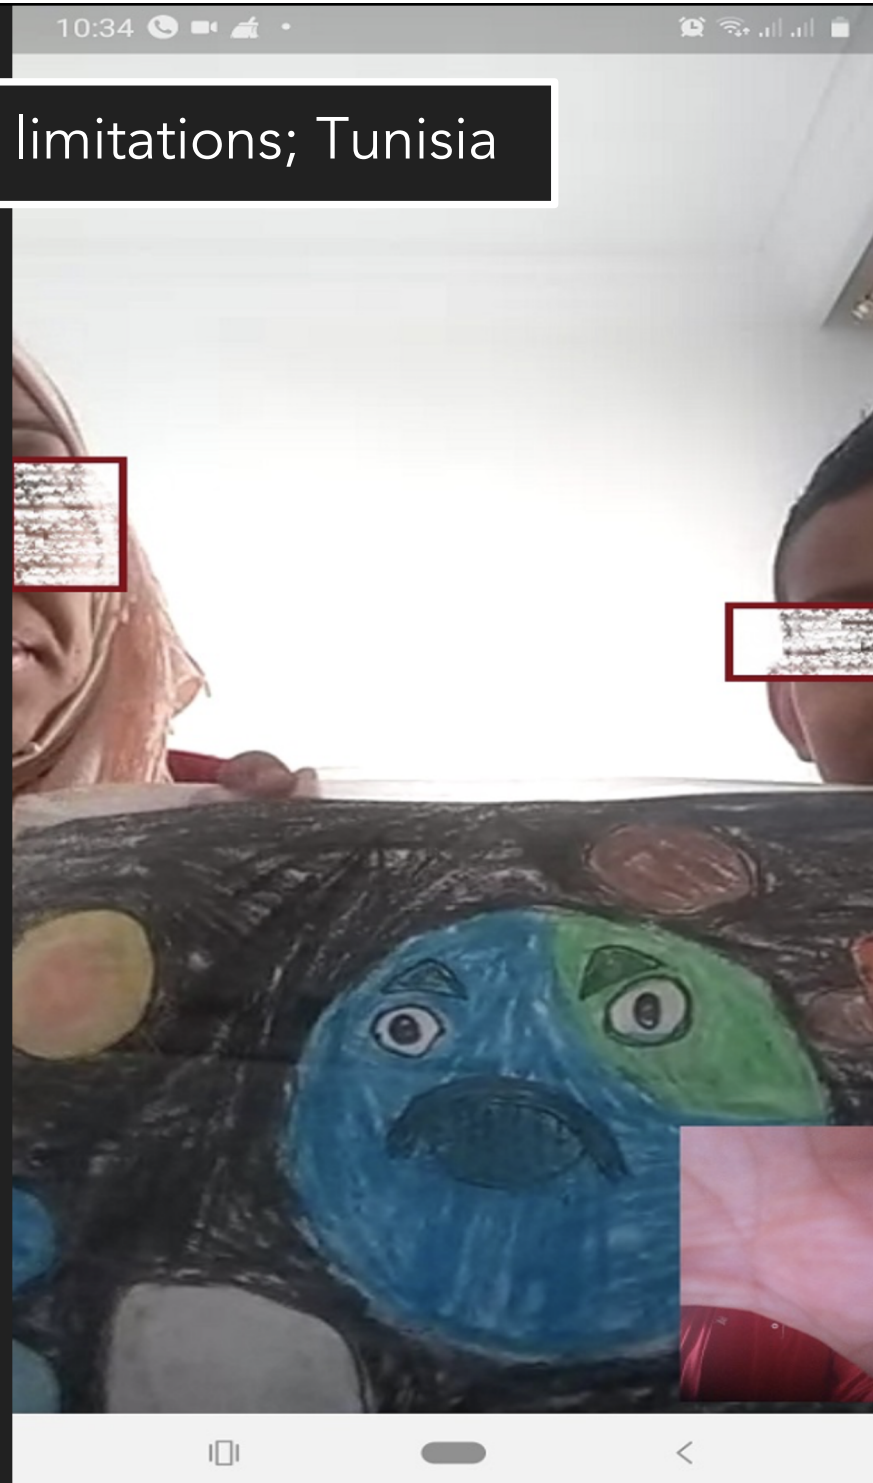



# 3.1 Changing practices; Dominican Republic

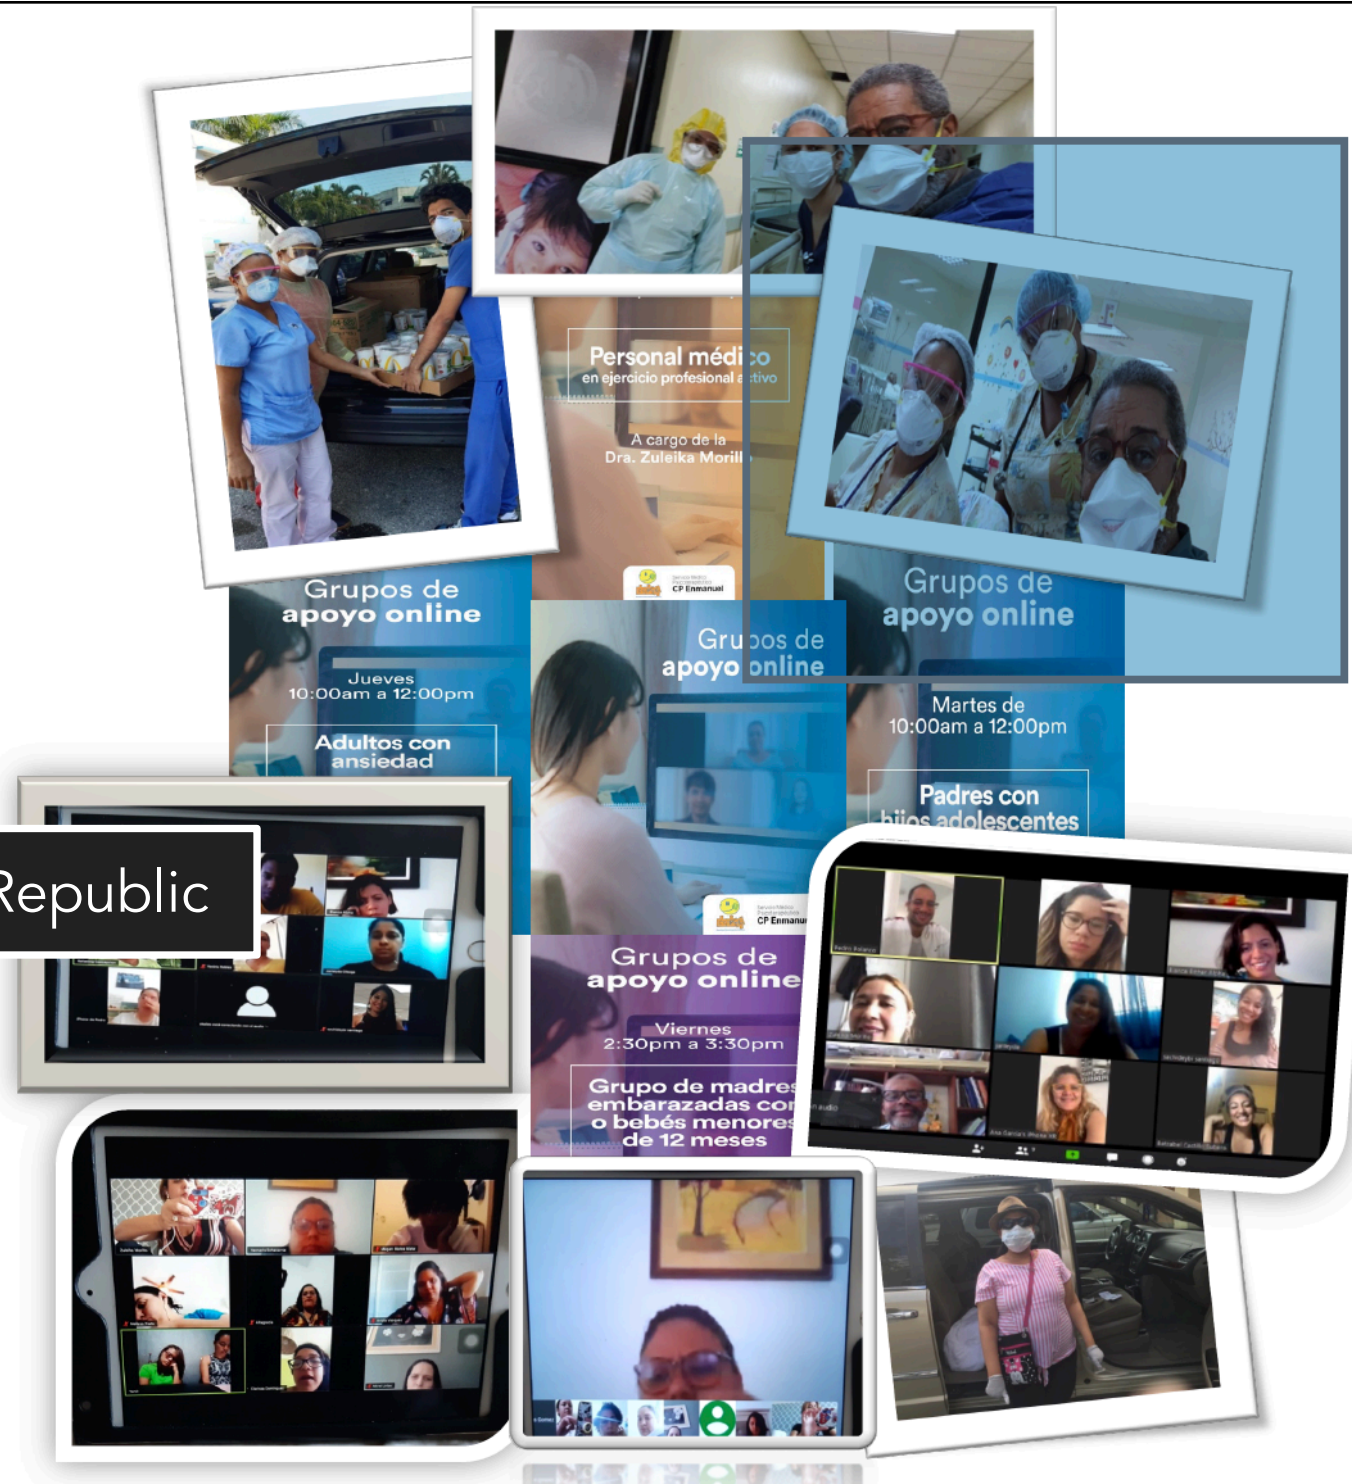



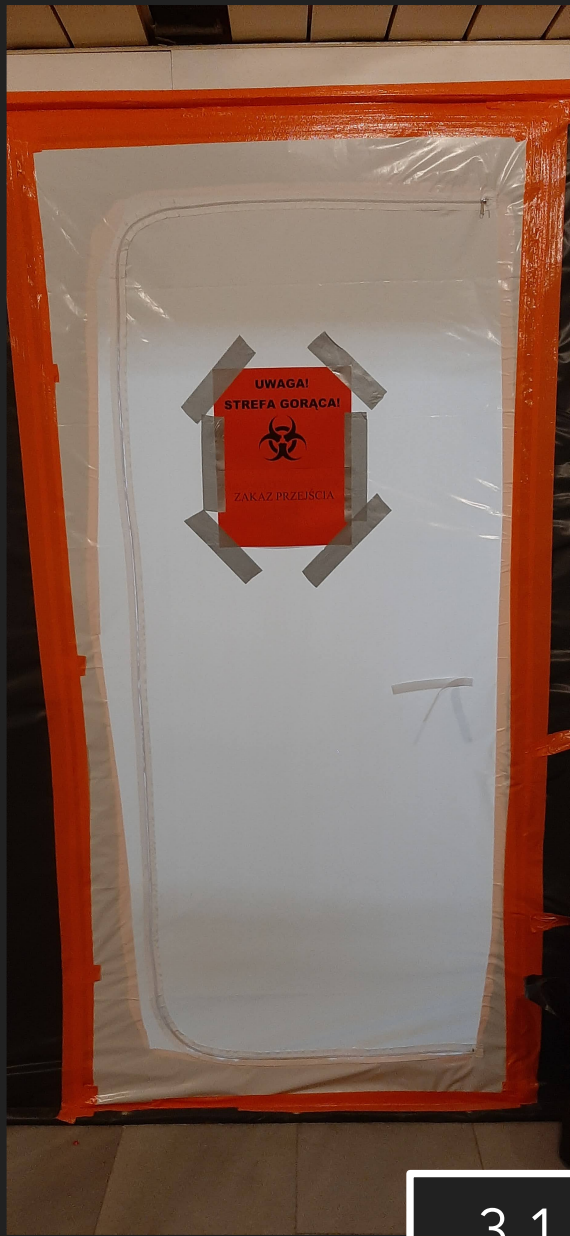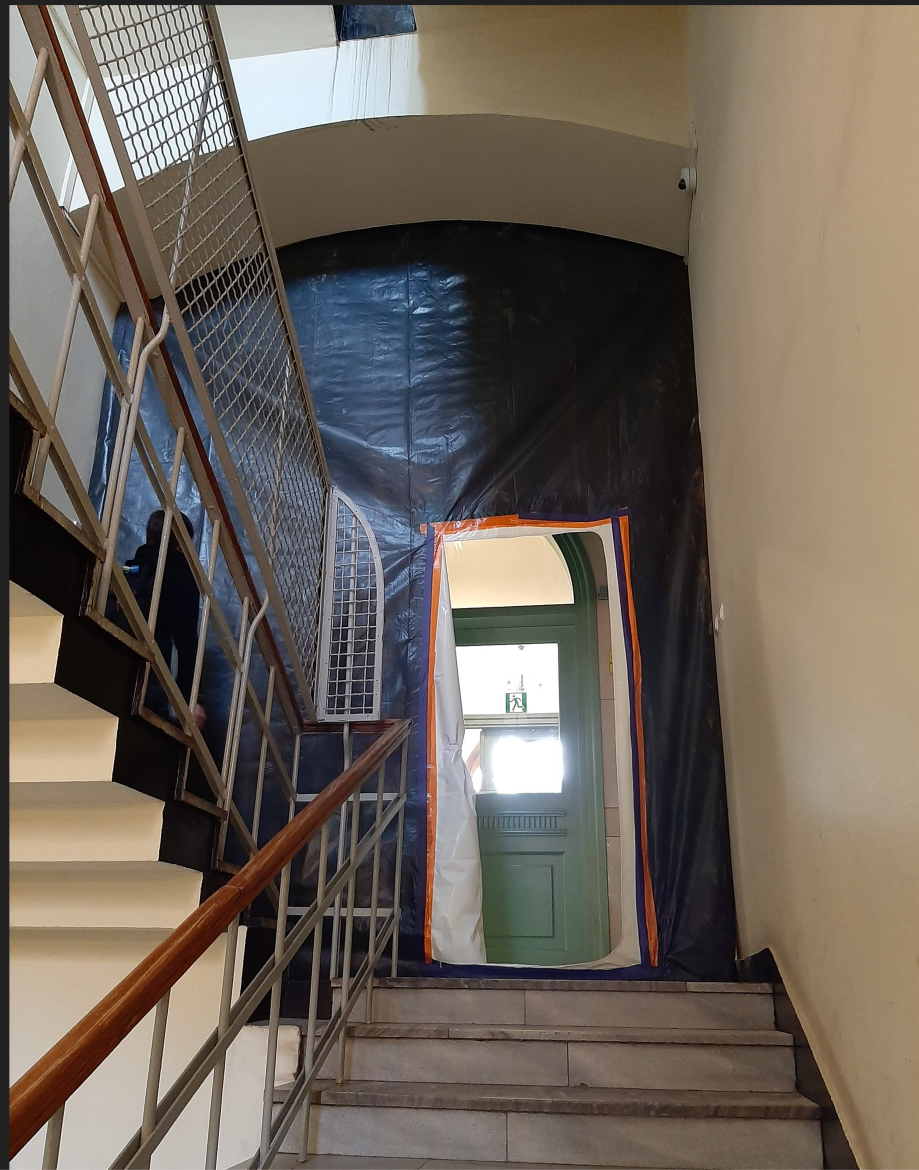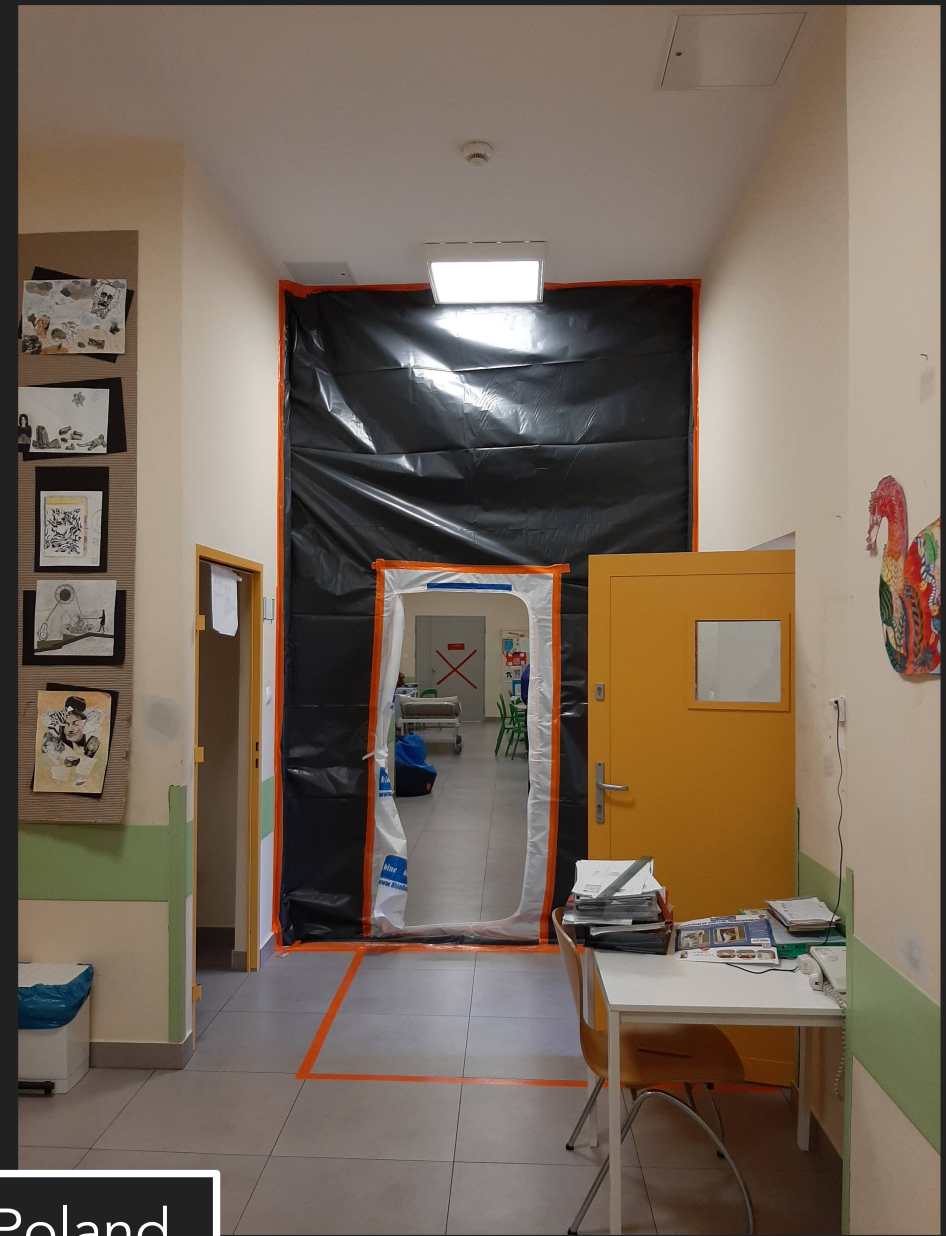

3.1 Service provision and delivery of care; Poland



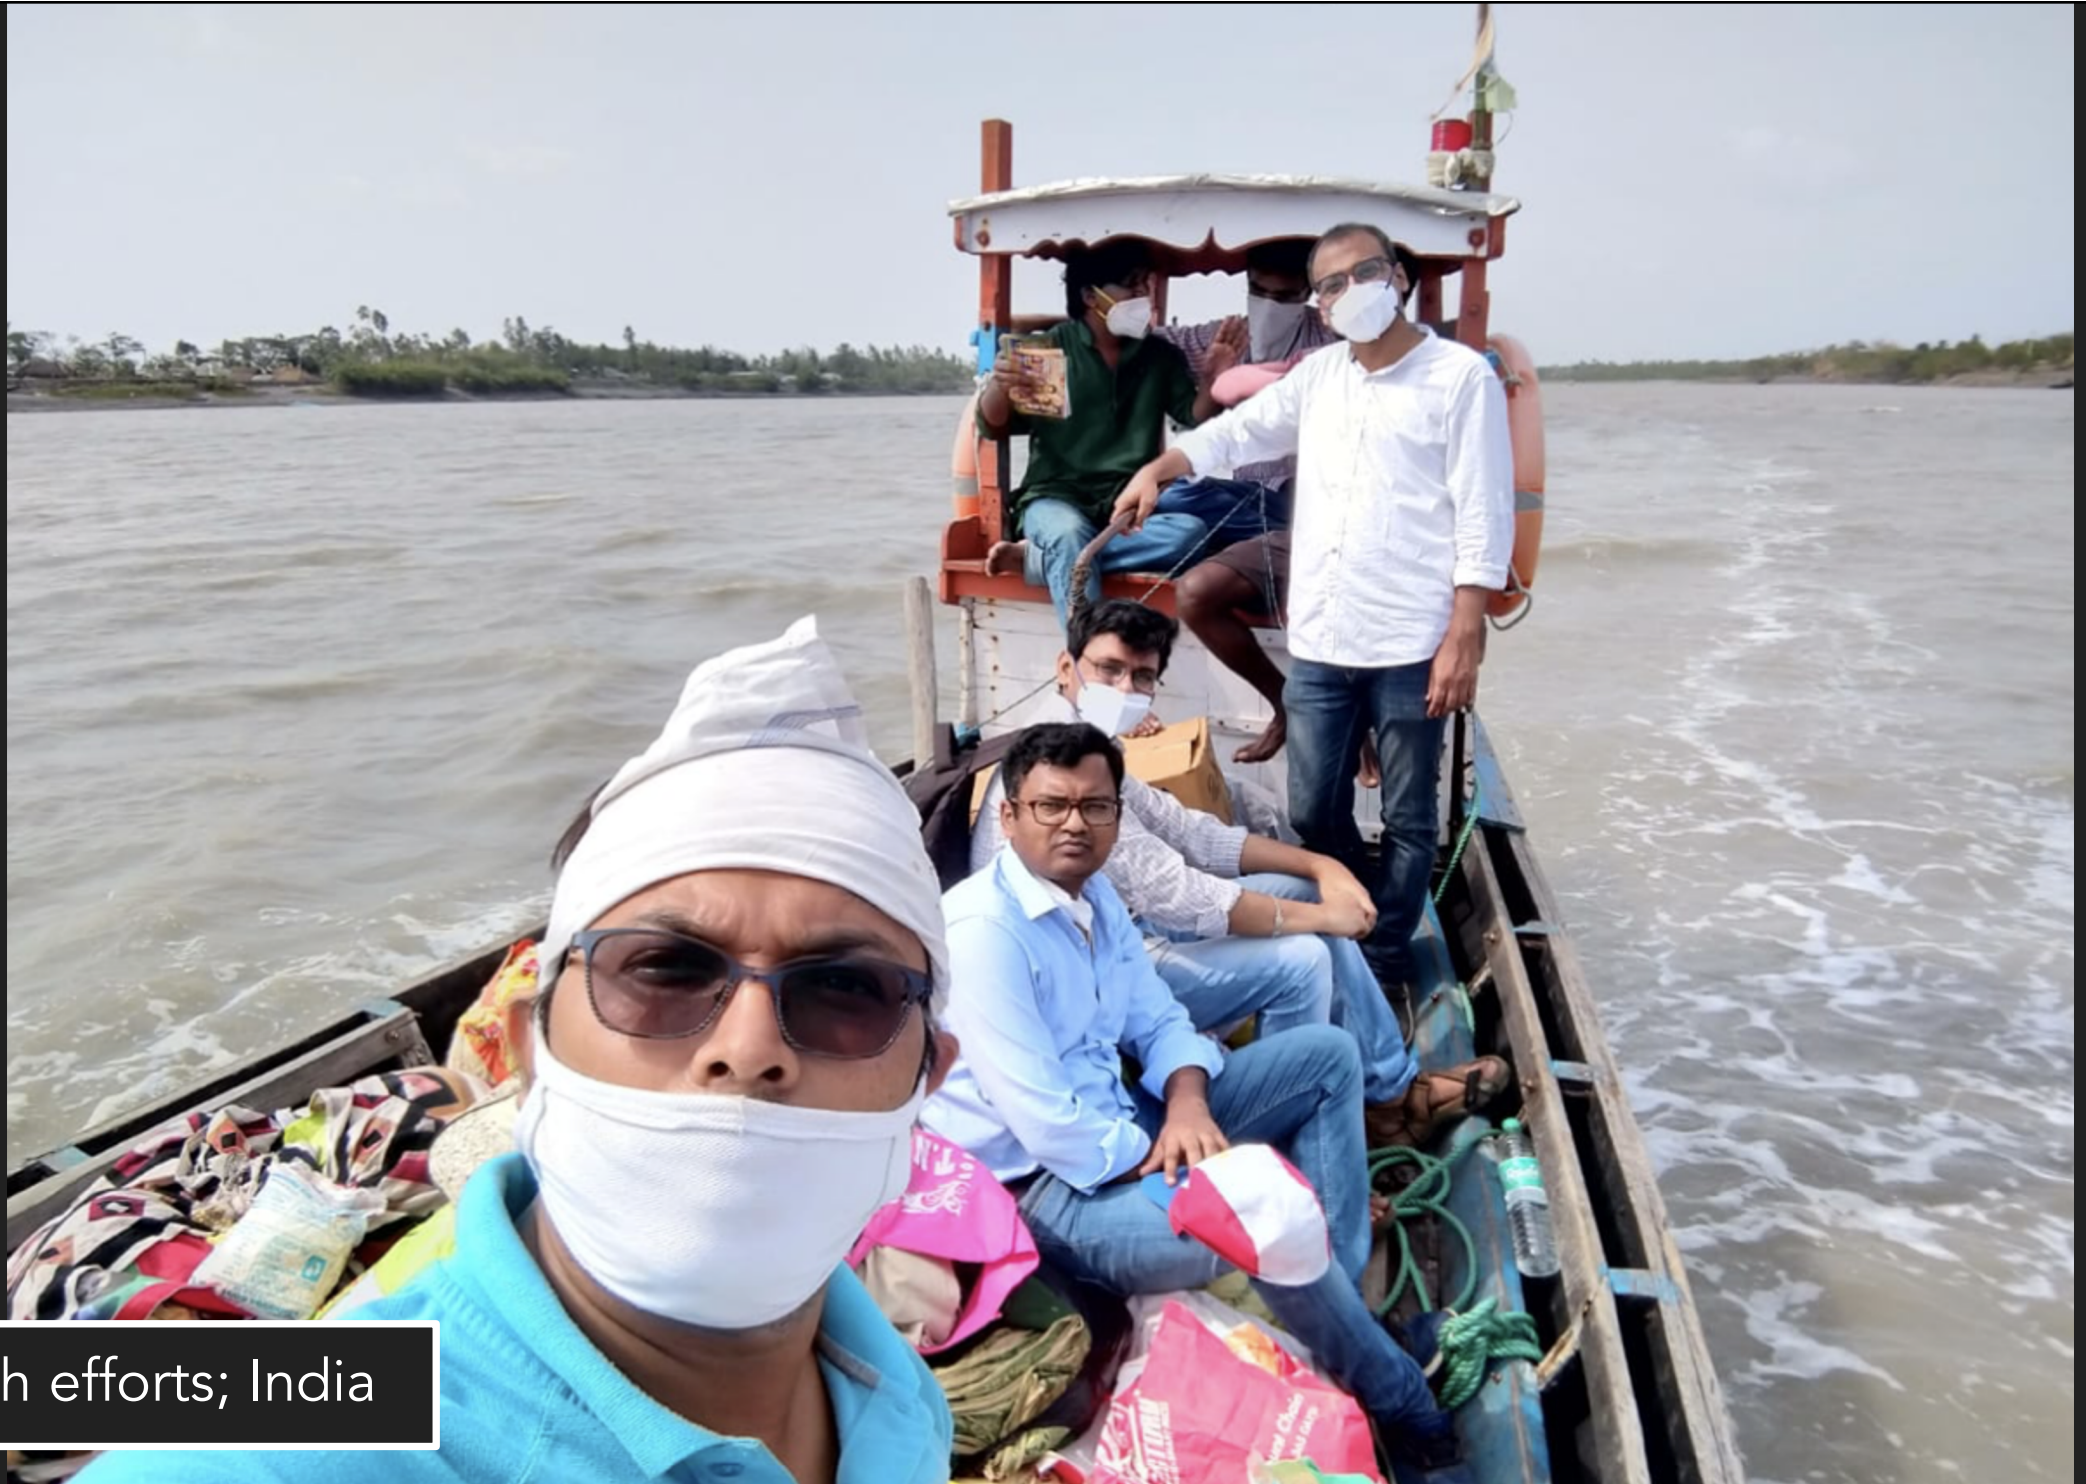

3.2 Outreach efforts; India



### 3.3 Guild pride; Cameroon

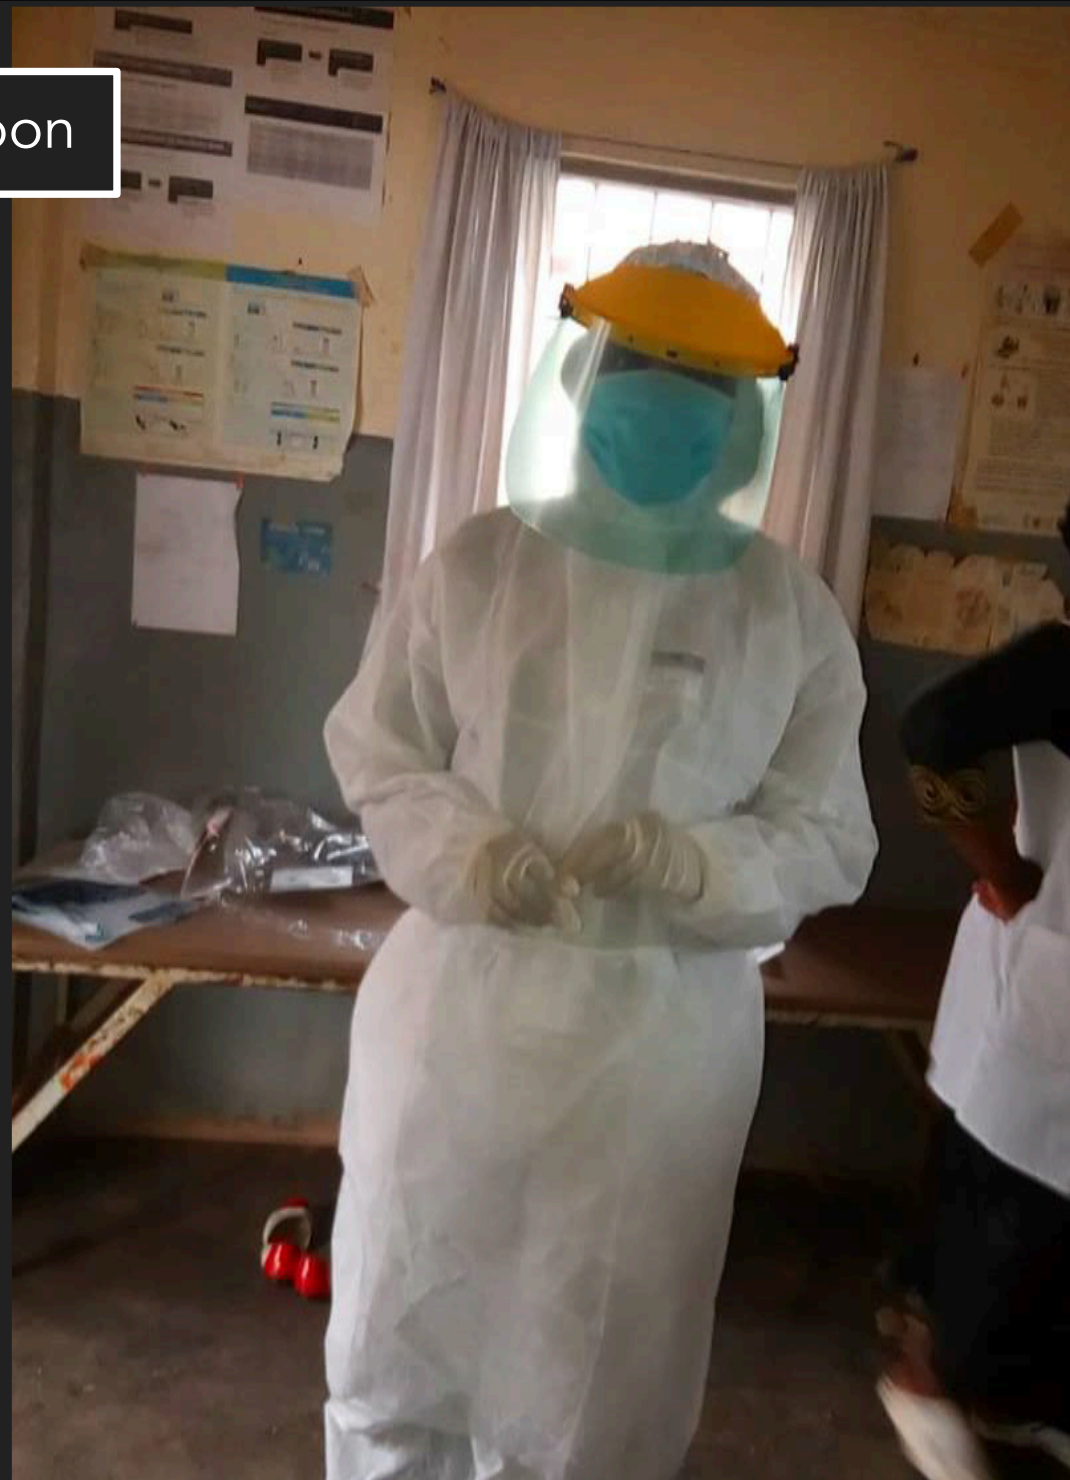



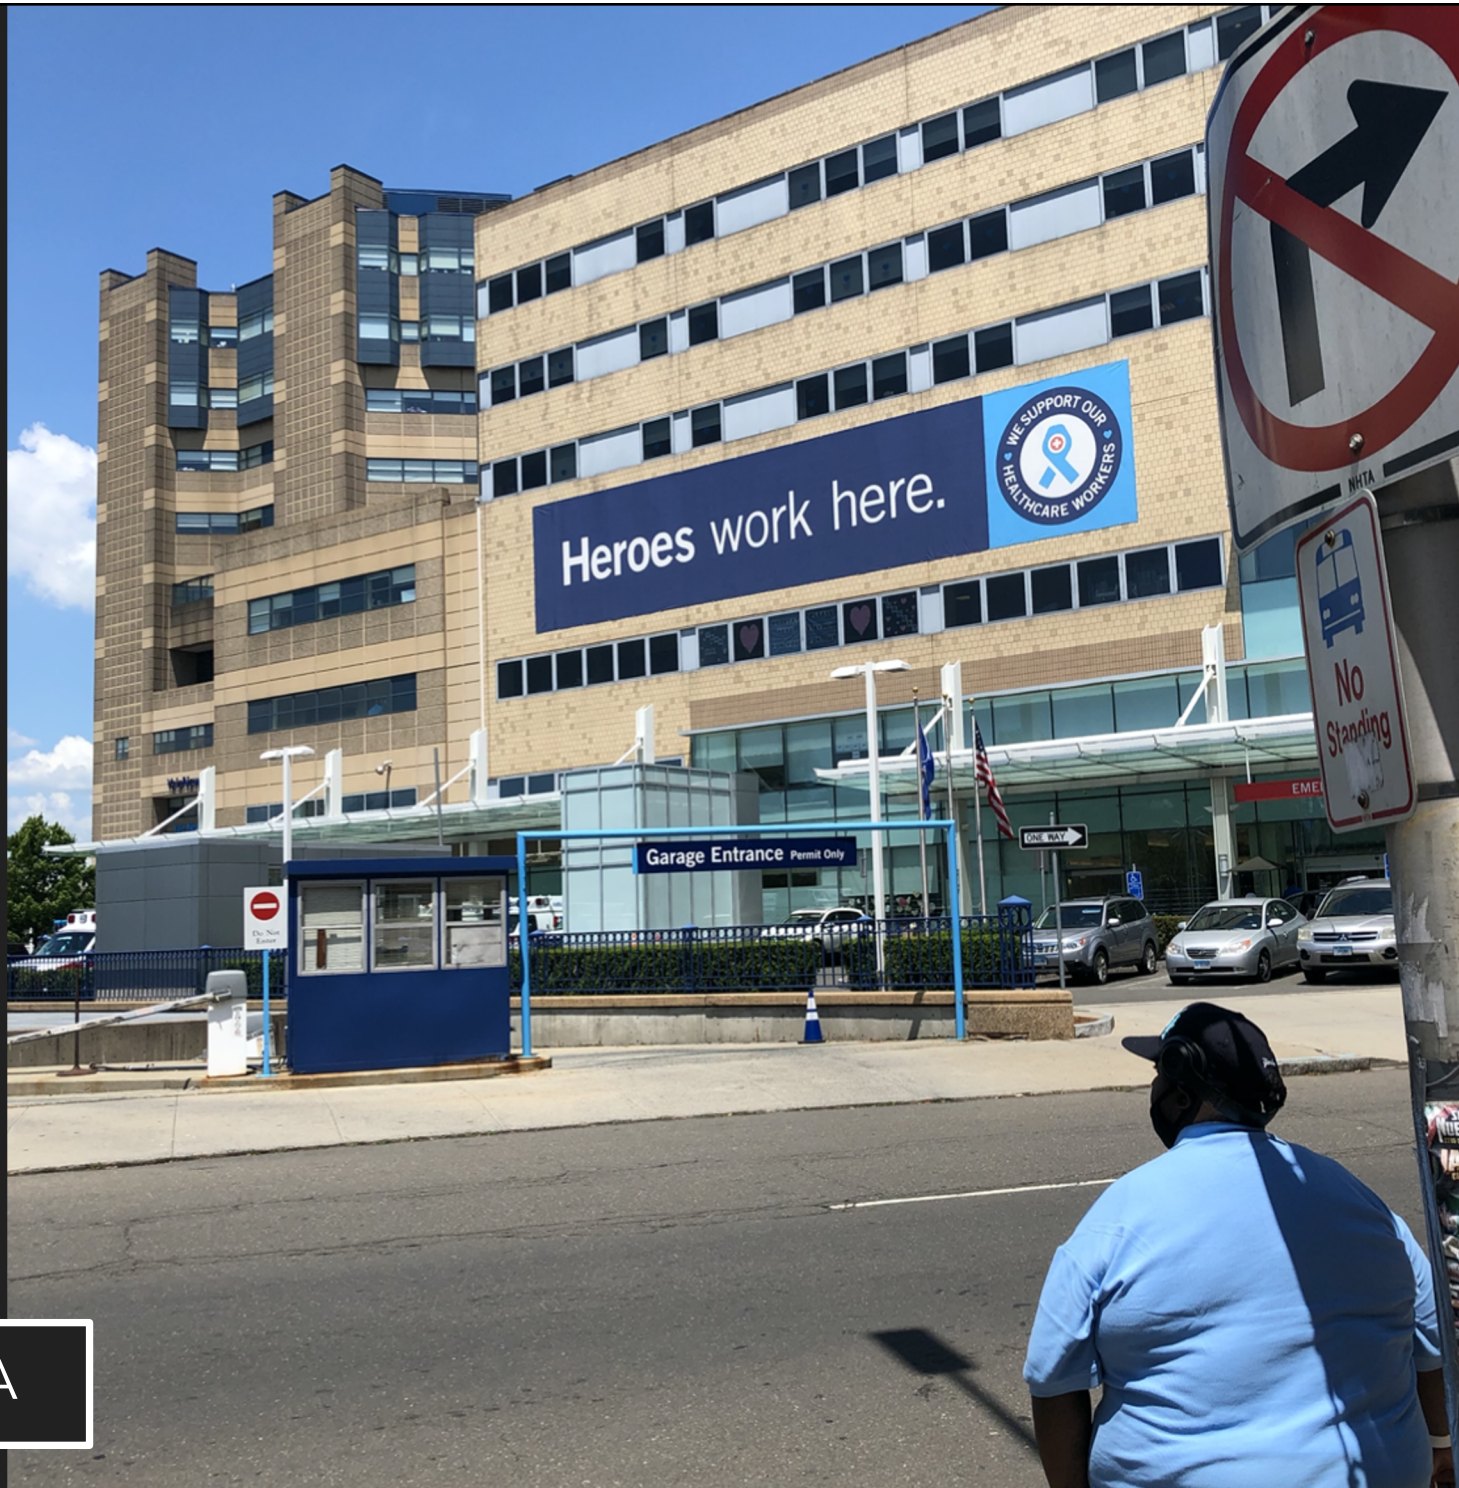

3.3 Guild guilt; USA

# 4. Purpose



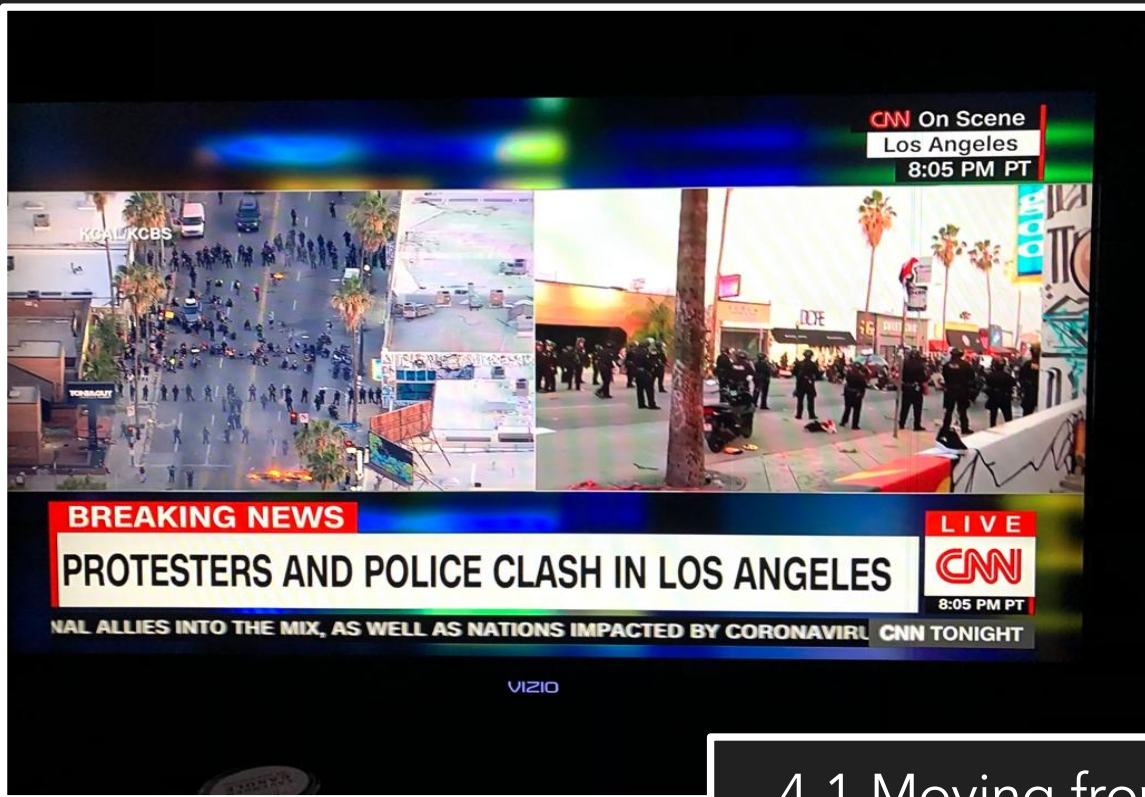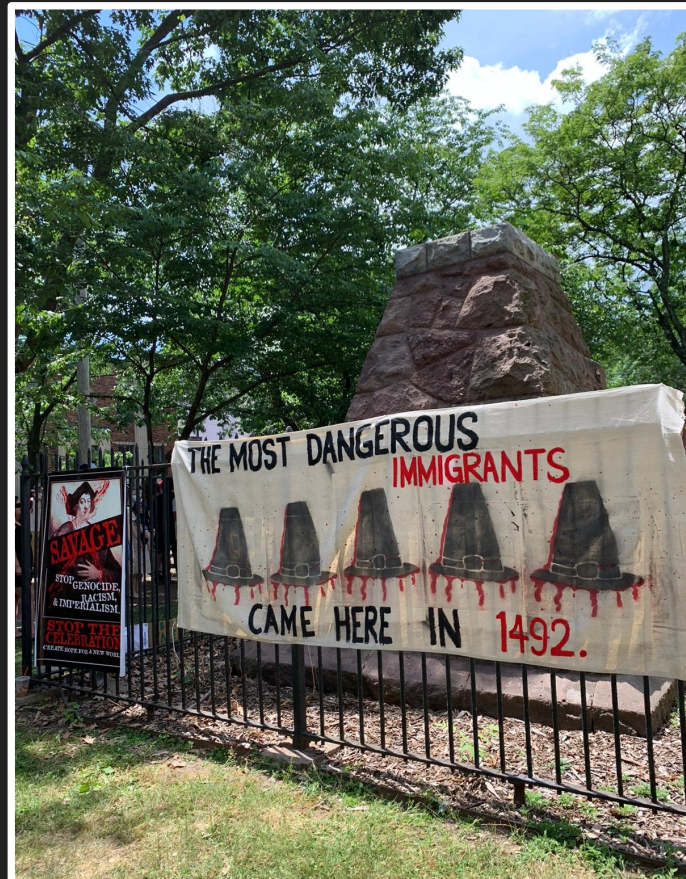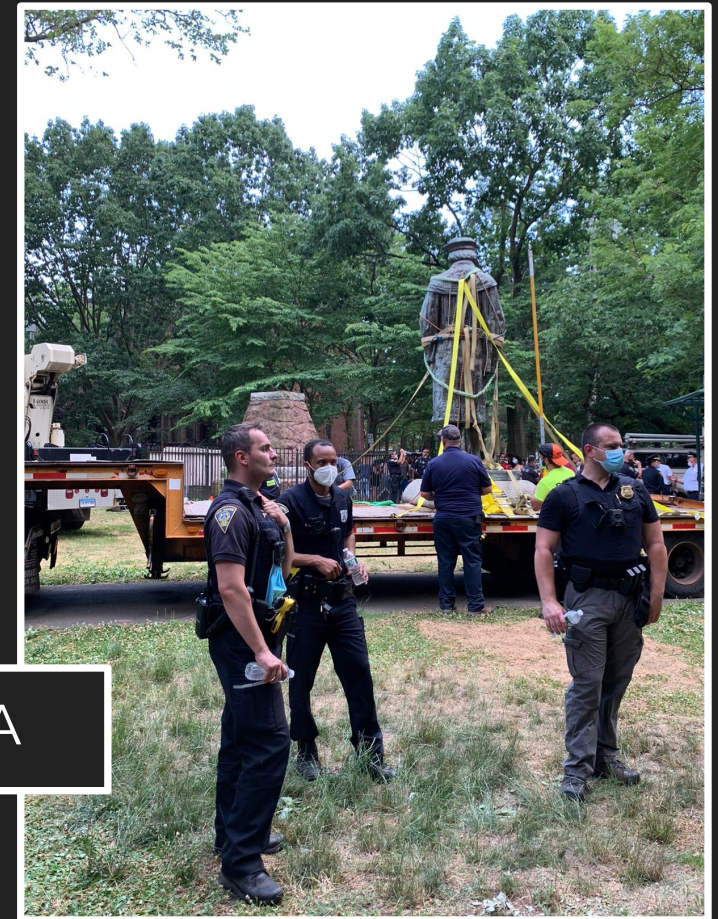

4.1 Moving from pandemic to syndemic; USA



## 4.2 Lamenting; South Africa

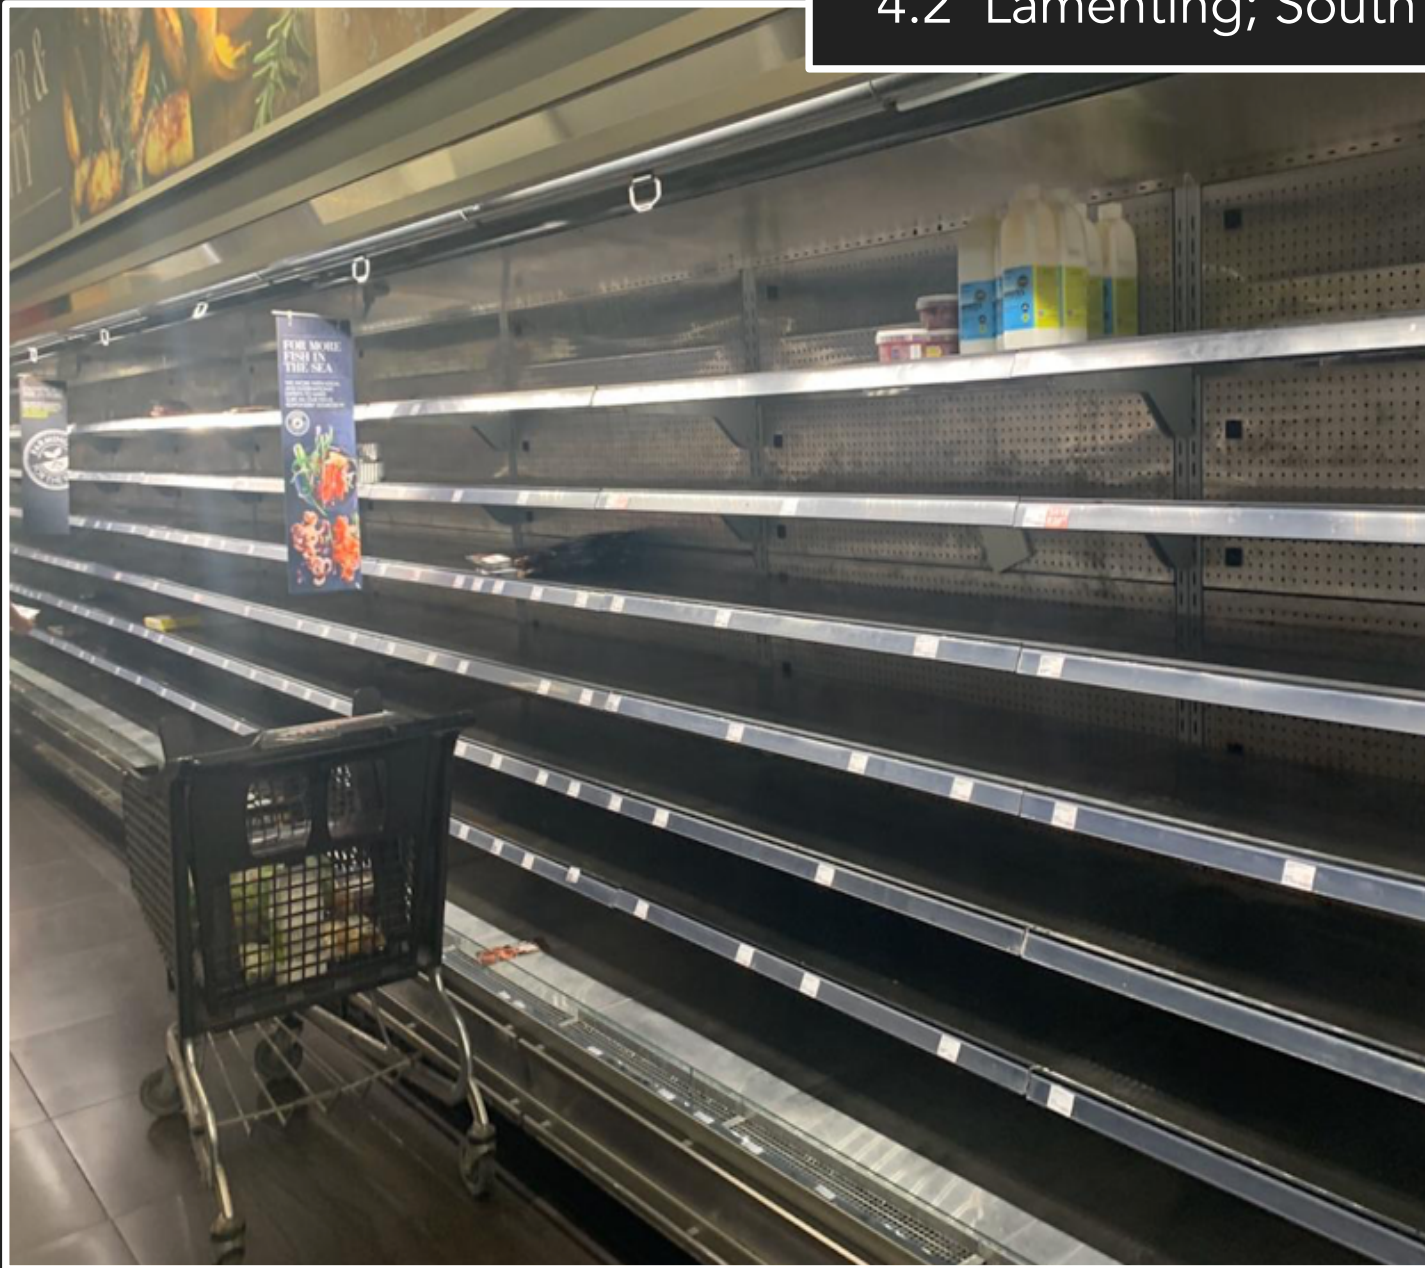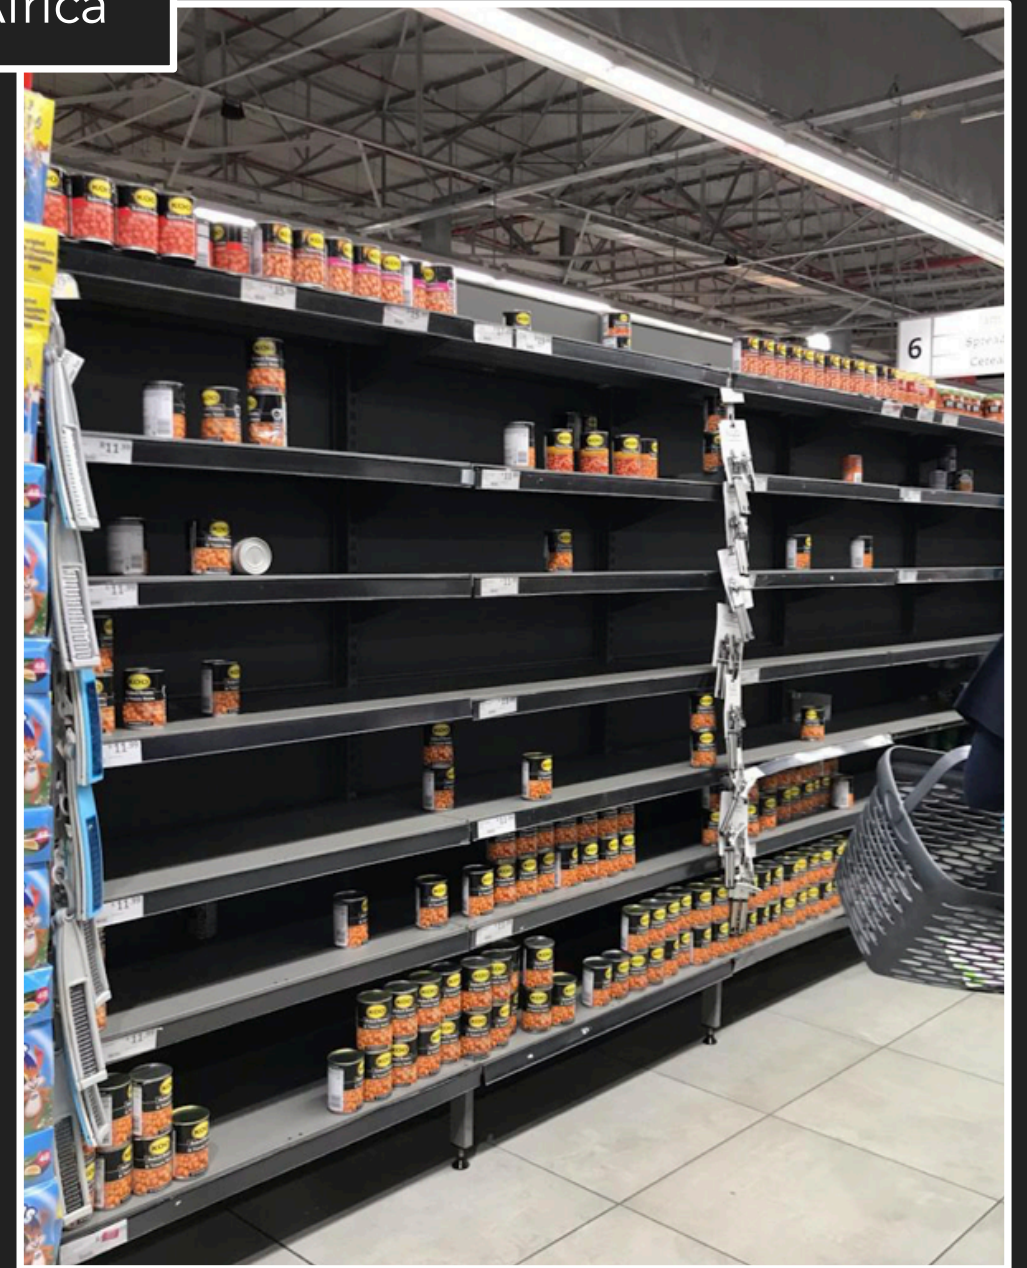



## 4.2 Embracing social responsibility; Chile

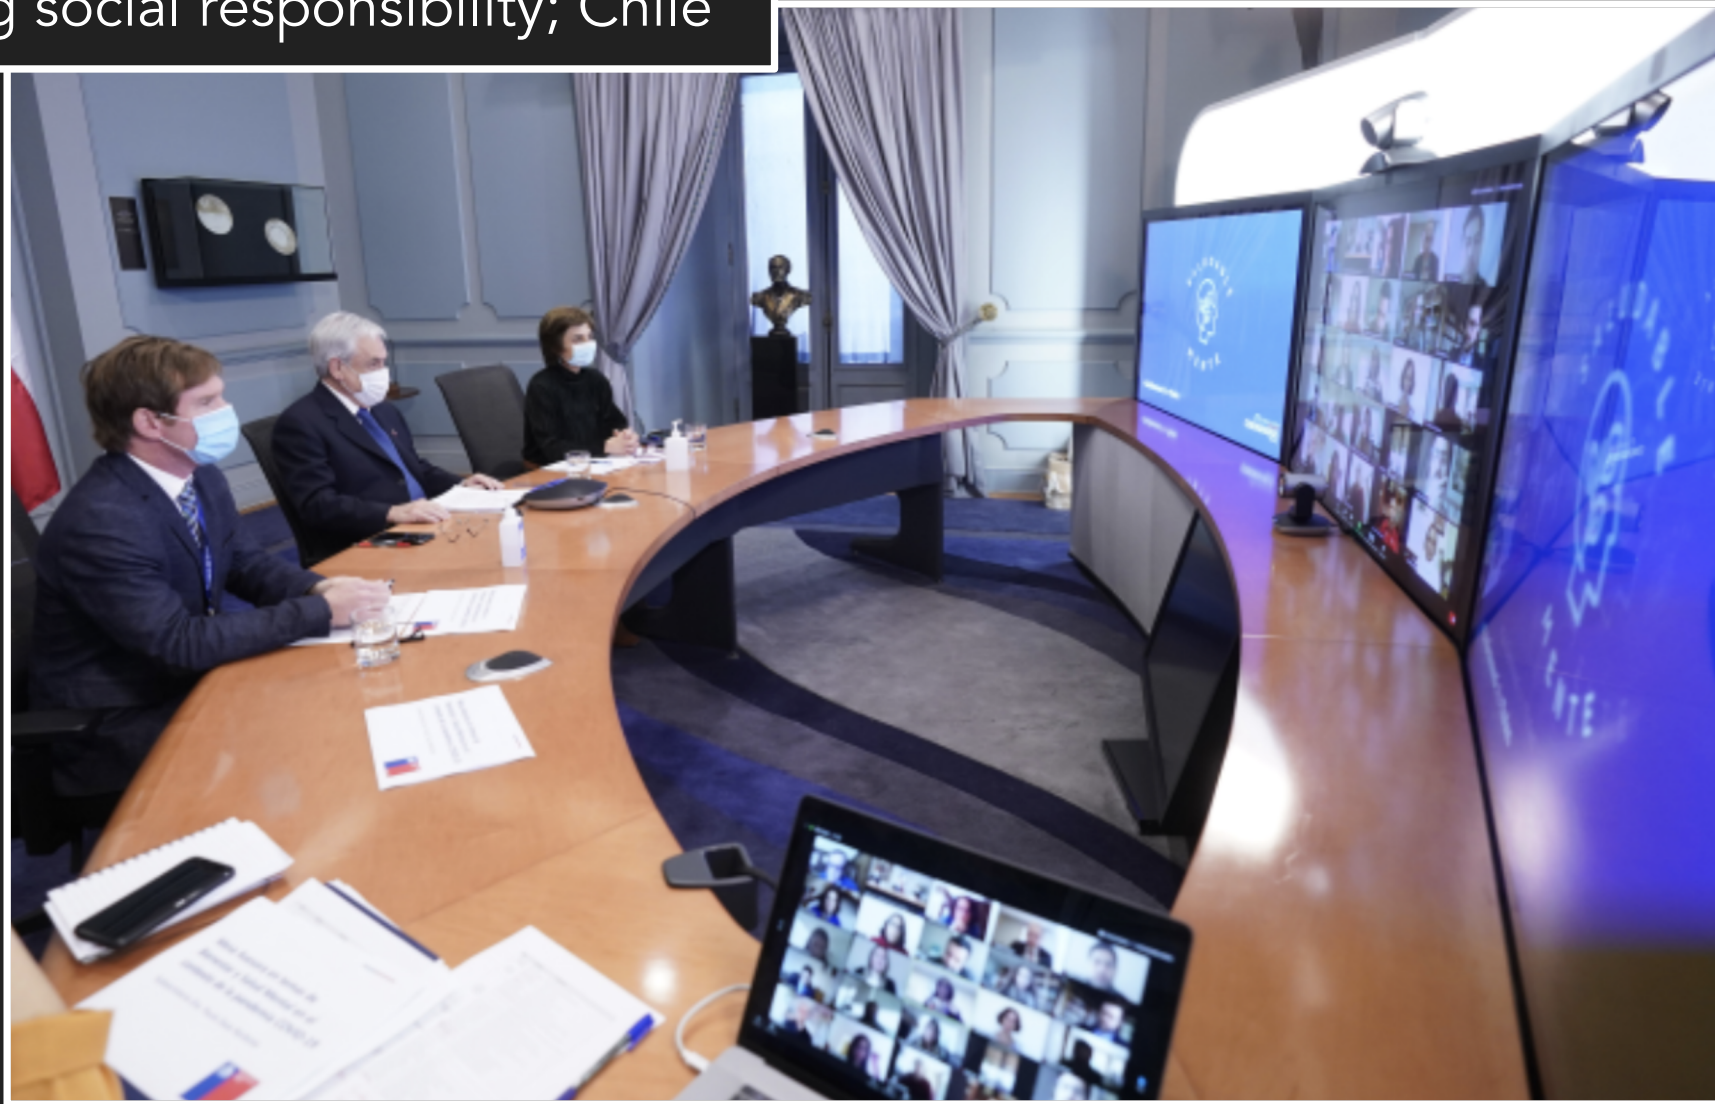



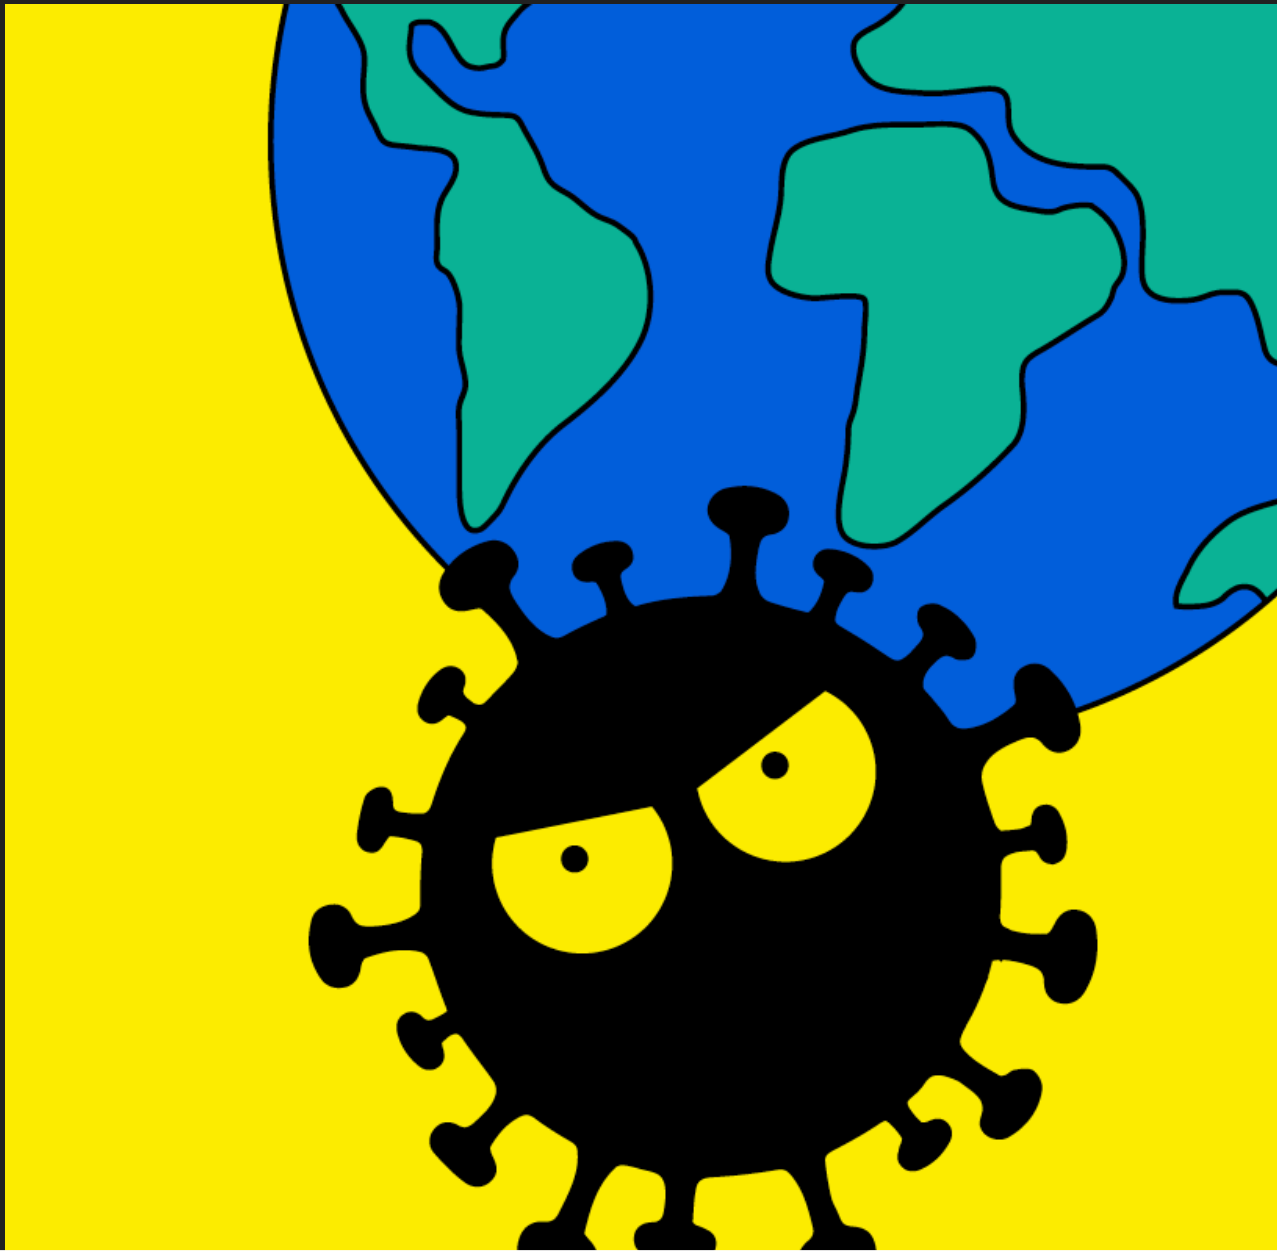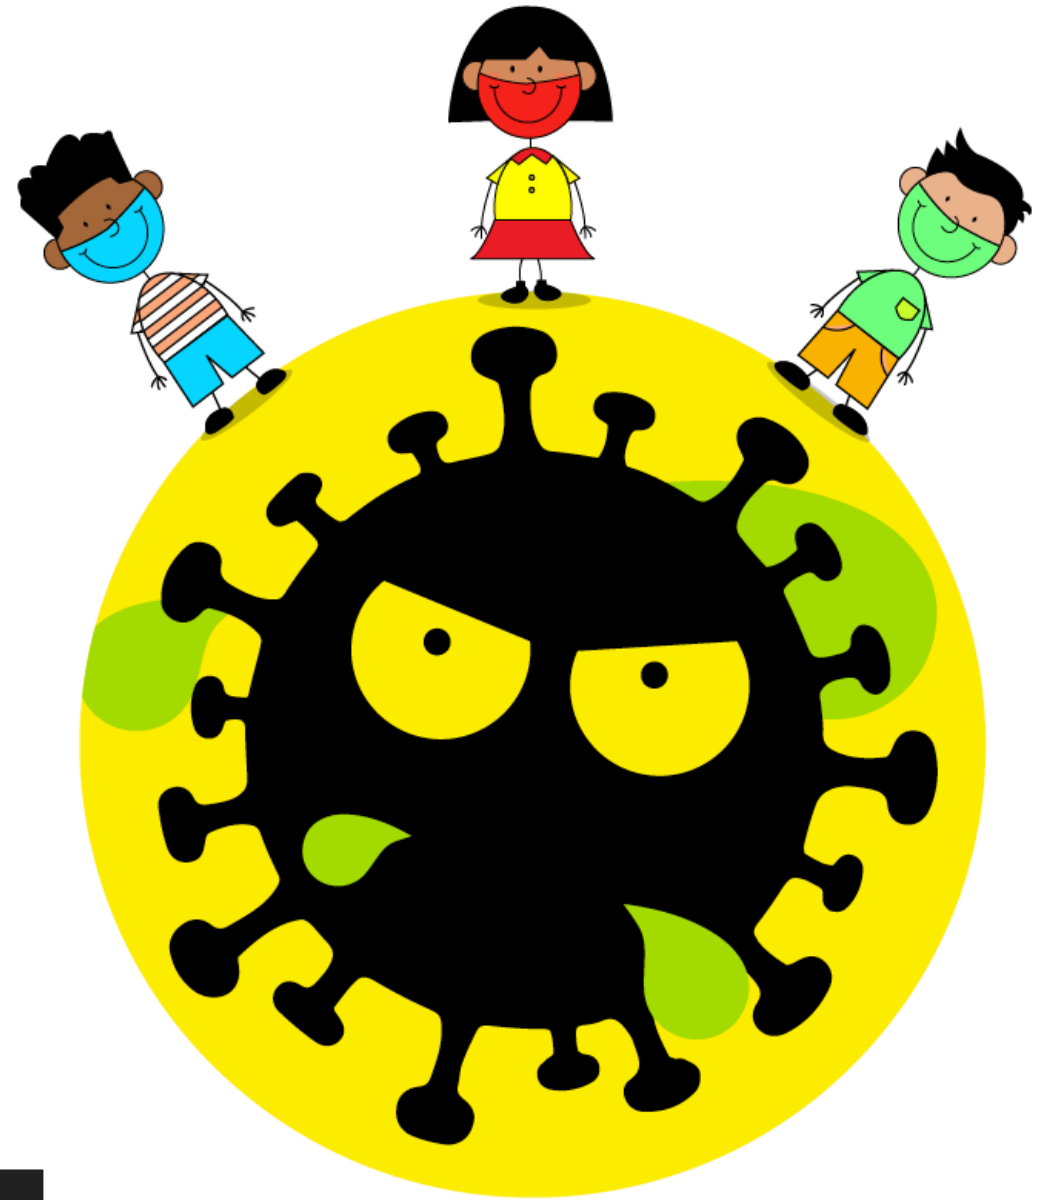

4.3 Planning toward a better tomorrow; South Africa
